1  
2  
3  
4  
5  
6  
7  
8  
9  
10  
11  
12  
13  
14  
15  
16  
17  
18  
19  
20  
21  
22  
23  
24  
25  
26  
27  
28  
29  
30  
31  
32

## Cohesin composition and dosage independently affect early development in zebrafish

### Authors

Labudina, A. A.,<sup>1</sup> Meier, M.,<sup>1</sup> Gimenez, G.,<sup>1</sup> Tatarakis, D.,<sup>2,3</sup> Ketharnathan, S.,<sup>1,4</sup> Mackie, B.,<sup>1</sup> Schilling, T. F.,<sup>2</sup> Antony, J.,<sup>1</sup> Horsfield J. A.<sup>1\*</sup>

### Affiliations

1. Department of Pathology, Dunedin School of Medicine, University of Otago, P.O. Box 913, Dunedin 9016, New Zealand.
2. Department of Developmental and Cell Biology, University of California, Irvine, Irvine, CA 92697-2300, USA.
3. Present Address: Denali Therapeutics, 161 Oyster Point Blvd. South San Francisco, CA 94080, USA.
4. Present address: Children’s Hospital of Eastern Ontario Research Institute, 401 Smyth Rd, Ottawa, Ottawa, ON K1H 5B2, Canada.

\* To whom correspondence should be addressed: [julia.horsfield@otago.ac.nz](mailto:julia.horsfield@otago.ac.nz)

### Abstract

Cohesin, a chromatin-associated protein complex with four core subunits (Smc1a, Smc3, Rad21 and either Stag1 or 2), has a central role in cell proliferation and gene expression in metazoans. Human developmental disorders termed “cohesinopathies” are characterised by germline mutations in cohesin or its regulators that do not entirely eliminate cohesin function. However, it is not clear if mutations in individual cohesin subunits have independent developmental consequences. Here we show that zebrafish *rad21* or *stag2* mutants independently influence embryonic tailbud development. Both mutants have altered mesoderm induction, but only homozygous or heterozygous *rad21* mutation affects cell cycle gene expression. *stag2* mutants have narrower notochords and reduced Wnt signaling in neuromesodermal progenitors as revealed by single cell RNA-sequencing.

33 Stimulation of Wnt signaling rescues transcription and morphology in *stag2*, but not *rad21*  
34 mutants. Our results suggest that mutations altering the quantity versus composition of  
35 cohesin have independent developmental consequences, with implications for the  
36 understanding and management of cohesinopathies.

37

38 **Teaser**

39 Viable zebrafish mutants show that cohesin complex quantity versus composition lead to  
40 different transcriptional and developmental outcomes in the early embryo.

41

42

## 43 **MAIN TEXT**

44

### 45 **Introduction**

46 Cohesin is a multiprotein ring-shaped complex that is highly conserved from yeast to  
47 humans. The vertebrate mitotic cohesin ring consists of two structural maintenance of  
48 chromosomes subunits, Smc1a, Smc3 and an  $\alpha$ -kleisin subunit Rad21 [1, 2]. In vertebrates Rad21  
49 interacts with either one of two Stromalin subunits, Stag1 or Stag2, and collectively these  
50 subunits are necessary for cohesin's association with DNA [3-5]. Additionally, Nipbl and Wapl  
51 modulate cohesin's residency on chromatin: Nipbl facilitates loading of cohesin onto DNA [6],  
52 while Wapl facilitates its release [7].

53 Cohesin is best known for its role in physically linking replicated sister chromatids to  
54 ensure the accurate transmission of genetic material to daughter cells during cell division [1]. In  
55 addition to mediating sister chromatin cohesion, the cohesin complex also functions to repair  
56 DNA double strand breaks [8-10]. Loss of functional cohesin results in mitotic arrest and cell  
57 death [11-13]. Only a small fraction of cohesin is necessary for sister chromatid cohesion [14]  
58 suggesting that the observed high levels of cohesin in certain non-dividing cell types has  
59 important non-cell cycle functions.

60 Cohesin also functions in three-dimensional (3D) genome organization and the regulation  
61 of gene expression [5, 15-19]. Loop extrusion activity by cohesin organizes DNA into  
62 topologically associated domains (TADs) that constrain the regulation of gene expression [20-24].  
63 The CCCTC-binding factor, CTCF, acts as a barrier to cohesin and limits loop extrusion between  
64 convergent CTCF sites [25, 26], leading to the overlap of cohesin and CTCF at TAD boundaries  
65 [25, 27-29]. In addition, cohesin has gene regulatory functions that are independent of CTCF [30].  
66 Sites bound by cohesin but not CTCF are frequent at tissue-specific enhancers and promoters  
67 [31]. Intra-TAD loops formed by cohesin can regulate transcription by mediating enhancer-  
68 promoter contacts [32, 33]. However, only a subset of enhancer-promoter contacts and DNA  
69 looping events appear to depend on cohesin [34-36].

70 Germline cohesin insufficiency gives rise to a spectrum of multifactorial developmental  
71 disorders collectively known as 'cohesinopathies' [4, 18]. Typically, cohesinopathies result from  
72 heterozygous mutations in cohesin subunits or their regulators [4]. Cohesinopathies are associated  
73 with developmental delay, a diverse range of developmental anomalies, and intellectual disability  
74 [37]. The best known cohesinopathy is Cornelia de Lange syndrome (CdLS, MIM #122470), a

75 multisystem disorder encompassing delayed growth, neurological and intellectual dysfunction,  
76 limb abnormalities and gastrointestinal defects [38-41]. Well over half of CdLS cases are caused  
77 by mutations in *NIPBL* [42, 43], with mutations in other cohesin-associated proteins accounting  
78 for a smaller subset of individuals with overlapping phenotypes. The specific presentation of  
79 CdLS varies according to the cohesin-associated protein affected by genetic changes [44, 45].

80 *RAD21* (MIM #606462) is among the five extensively studied genes associated with CdLS  
81 [42, 46, 47]. Individuals with *RAD21* mutations display growth retardation, minor skeletal  
82 anomalies, and facial features that overlap with CdLS, but lack severe intellectual disabilities  
83 [48]. Mutations in *RAD21* are also linked with Mungan Syndrome (MIM #611376) [49],  
84 sclerocornea [50] and holoprosencephaly [51]. Most *RAD21* mutations associated with  
85 cohesinopathy are truncations, missense mutations or in-frame deletions that are predicted to  
86 interrupt the interaction between *RAD21* and *SMC1A*, *SMC3*, or *STAG1/2* [52, 53]. *RAD21*  
87 physically bridges the *SMC1A/SMC3* heads and facilitates the cohesin loading process, likely by  
88 controlling the amount that complexes with DNA [54]. Therefore *RAD21* abundance has  
89 potential to directly modulate the quantity of cohesin complexes on DNA and its mutation or  
90 deficiency would result in reduction in cohesin dose. Interestingly, the *RAD21* protein must be  
91 intact for stable cohesin binding and looping at CTCF-CTCF sites, and must be present but not  
92 necessarily intact for looped contacts inside of CTCF domains [55]. Further supporting evidence  
93 suggests that the cohesion and loop extrusion activities of cohesin can be separated  
94 experimentally and that cohesin uses distinct mechanisms to perform these two functions [56].

95 Individuals with *STAG2* deficiency also display features of cohesinopathies [51, 57-60].  
96 Loss-of-function mutations in *STAG2* on the X chromosome are associated with Mullegama-  
97 Klein-Martinez syndrome (MKMS, MIM #301022) in females but only missense mutations are  
98 tolerated in males [61]. Exome sequencing further established *STAG1* and *STAG2* variants in  
99 patients with cohesinopathy phenotypes as loss-of-function [62] and recently, loss-of-function  
100 variants of *STAG2* have been categorized as X-linked cohesinopathies with features of CdLS [58,  
101 60]. For example an individual with a mosaic *STAG2* variant was described to have  
102 developmental delay, microcephaly, and hemihypotrophy of the right side [63]. A distinctive  
103 cohesinopathy involving Xq25 microduplication that exclusively affects *STAG2* gives rise to  
104 moderate intellectual disability, speech delay and facial dysmorphism [64]. Additionally, some  
105 cases exhibit structural brain malformations consistent with holoprosencephaly [51, 57, 58, 60].  
106 Several molecular studies show that *STAG1* and *STAG2* paralogues have distinct roles in 3D  
107 genome organization, but overlapping roles in the cell cycle [16, 65-69]. Moreover, *STAG*

108 subunits can be detected at specific locations on DNA independently of the rest of the cohesin  
109 complex [67, 70]. Deficiency in STAG2 leads to the upregulation of STAG1 and the substitution  
110 of STAG1 for STAG2 in the cohesin complex such that *STAG2* mutation leads to altered cohesin  
111 composition [71, 72].

112 Dysregulated expression of multiple genes downstream of cohesin deficiency is thought to  
113 be the predominant cause of cohesinopathies [12, 73-76]. Because human cohesinopathies with  
114 different genetic causes present with diverse phenotypes, it is possible that cohesin subunits  
115 independently modulate the transcription function of cohesin during development. This idea has  
116 not yet been tested in the early embryo when the developmental changes in cohesinopathies are  
117 determined. In this study we compare the transcriptional and developmental consequences of  
118 depleting Rad21 with depletion of Stag2. Rad21 controls cohesin quantity on DNA [54] while  
119 Stag2 is thought to bind DNA independently and locate cohesin to enhancers [65, 67, 70].  
120 Therefore, we expect *stag2* mutants to interfere with cohesin's gene expression functions without  
121 interfering with the cell cycle. Because *stag1b* and *stag2b* mutants are viable [77] and the effects  
122 of *rad21* deficiency are dose-dependent [78], zebrafish offer a unique opportunity to investigate  
123 how cohesin complex quantity, versus cohesin complex composition, affects cell fate decisions in  
124 the early embryo [79]. To explore this question, we focus on the tailbud as a stem cell model.

125 The tailbud, located at the posterior end of the developing embryo, contains two  
126 populations of bipotent stem cells known as neuromesodermal progenitors (NMPs) and midline  
127 progenitor cells (MPCs) [80, 81]. These cells continuously divide and differentiate into  
128 neuroectoderm and mesoderm by activating cell type-specific transcription. By analysing *rad21*  
129 heterozygous and homozygous mutants (reflecting cohesin dose) and *stag2b* mutants (reflecting  
130 cohesin type), we compare how the amount and composition of the cohesin complex affect  
131 transcription in tailbud cells. We find that although *rad21* heterozygous mutants are viable and  
132 fertile, they exhibit altered expression of thousands of genes in the tailbud including cell cycle  
133 regulators, demonstrating that decreased cohesin dose affects both cell cycle and gene expression.  
134 In contrast, cell cycle gene expression is largely unaffected in *stag2* homozygous mutants, which  
135 are also viable and fertile. However *stag2* mutants show a unique narrowing of the midline  
136 mesodermal domain that forms the notochord, which is restored by concomitant removal of *stag1*.

137 Therefore, although both *rad21* and *stag2* cohesin mutants show deficiencies in mesoderm  
138 derived from NMPs and MPCs, the underlying molecular mechanisms are remarkably dissimilar.  
139 Rad21 deficiency blocks NMP differentiation leading to lack of mesodermal derivatives, while  
140 loss of *stag2* mutants causes NMPs to downregulate Wnt signaling leading to epithelial to

141 mesenchyme (EMT) defects. Changes in phenotype and gene expression unique to *stag2* mutants  
142 are rescued by stimulation of Wnt signaling by GSK3 inhibition, to which Rad21-deficient  
143 embryos are impervious.

## 144 145 Results

### 147 Stag1b and Stag2b are the main functional Stags in zebrafish

148 Zebrafish have four Stag paralogues: Stag1a, Stag1b, Stag2a, and Stag2b. Individual *stag* mutant  
149 lines (except *stag2a*) were previously generated and are homozygous viable [77]. To determine  
150 which paralogs are crucial for zebrafish development, we analysed the consequences of  
151 combining *stag1a* and *stag2b* as well as *stag1b* and *stag2b* mutants.

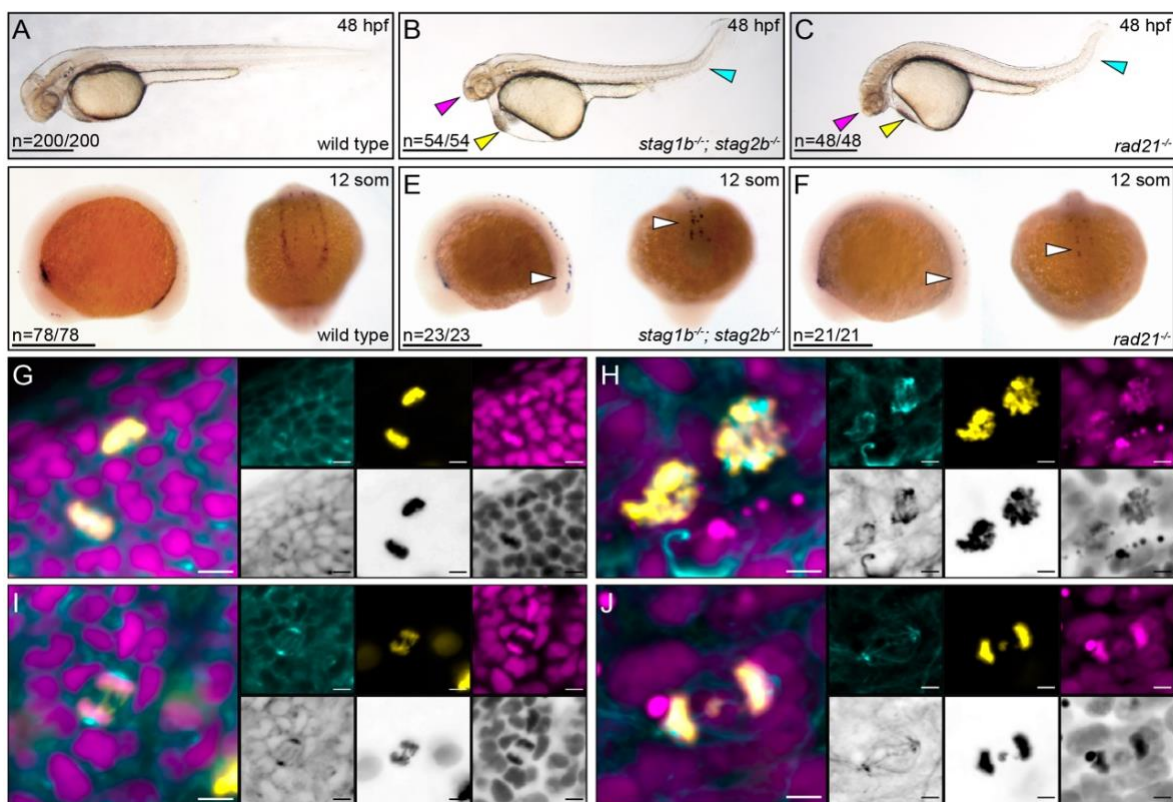

**Fig. 1. Stag1b and Stag2b are the main functional Stag1 and Stag2 in Zebrafish.** (A-C) Lateral views of representative wild type (A), *stag1b<sup>-/-</sup>; stag2b<sup>-/-</sup>* (B) and *rad21<sup>-/-</sup>* (C) embryos at 48 hours post-fertilization (hpf). Arrows indicate developmental anomalies: magenta for a small head, yellow for pericardial oedema, and cyan for a kinked tail. Scale bars are 500  $\mu$ m. (D-F) Expression of *runx1* at 12 somites in wild type (D), *stag1b<sup>-/-</sup>; stag2b<sup>-/-</sup>* (E) and *rad21<sup>-/-</sup>* (F) embryos. Lateral and posterior views are shown. White arrows indicate the loss of *runx1* expression in PLM. Scale bars are 500  $\mu$ m. The numbers in the lower left hand corner indicate the number of embryos with similar expression patterns. (G-J) Confocal images of cell cycle progression in wild type (G,I) and *stag1b<sup>-/-</sup>; stag2b<sup>-/-</sup>* (H,J) embryos at 48 hpf stained with anti- $\alpha$ -tubulin (cyan), anti-phH3 (yellow) antibodies and Hoechst (magenta). Images are maximum intensity projections of 3 (0.15  $\mu$ m) optical sections taken from the tail region of 48 hpf embryos. Scale bars are 5  $\mu$ m.



152 *stag1b*<sup>-/-</sup>; *stag2b*<sup>-/-</sup> double mutant embryos were developmentally delayed compared to  
153 wild type, and by ~48 hours post-fertilization (hpf), mutant embryos had arrested in development  
154 presenting with small heads, pericardial oedema, upwards bending tails, and no blood circulation  
155 (Fig. 1B compared with A). This phenotype resembles *rad21*<sup>-/-</sup> mutant embryos, which die due to  
156 mitotic catastrophe (Fig. 1C) [12]. In contrast, *stag1a*<sup>-/-</sup>; *stag2b*<sup>-/-</sup> embryos developed normally  
157 and are homozygous viable and fertile, although a small proportion (~5%) of *stag1a*<sup>-/-</sup>; *stag2b*<sup>-/-</sup>  
158 embryos displayed hemorrhaging above the notochord at 48 hpf (Fig. S1A).

159 The gene encoding haematopoietic and neuronal transcription factor Runx1 is expressed in  
160 the anterior lateral plate mesoderm (ALM), the posterior lateral plate mesoderm (PLM), and in  
161 Rohon-Beard (RB) neurons in early zebrafish development (Fig. 1D) [82]. Rad21 is required for  
162 *runx1* expression in the PLM [12]. We previously found that *runx1* expression is normal in  
163 individual *stag* mutants [77]. However, we observed loss of *runx1* expression in the PLM of the  
164 *stag1b*<sup>-/-</sup>; *stag2b*<sup>-/-</sup> embryos and retained *runx1* expression in the ALM and RB neurons (Fig. 1E).  
165 This resembles changes in *runx1* expression in the *rad21*<sup>-/-</sup> mutant (Fig. 1F) [12], and is consistent  
166 with a requirement for an intact cohesin complex for *runx1* expression in the PLM. In contrast,  
167 *runx1* expression was normal in *stag1a*<sup>-/-</sup>; *stag2b*<sup>-/-</sup> embryos (Fig. S1B).

168 We next examined the morphology of mitotic cells in *stag1b*<sup>-/-</sup>; *stag2b*<sup>-/-</sup> embryos at 48 hpf  
169 (Fig. 1G-J). In contrast to wild type embryos (Fig. 1G, I) condensed chromosomes were  
170 disorganized and abnormally distributed in *stag1b*<sup>-/-</sup>; *stag2b*<sup>-/-</sup> embryos, (Fig. 1H). Lagging  
171 chromosomes failed to properly separate during anaphase, resulting in some chromosomes  
172 remaining in cell centers (Fig. 1J). These findings suggest that cells in *stag1b*<sup>-/-</sup>; *stag2b*<sup>-/-</sup> mutants  
173 lack functional cohesin by 48 hpf, leading to a mitotic blockade. Individual *stag* mutants [77] as  
174 well as the *stag1a*<sup>-/-</sup>; *stag2b*<sup>-/-</sup> double mutant, are homozygous viable. However, loss of both,  
175 *stag1b* and *stag2b*, is embryonic lethal and phenocopies the previously described *rad21*<sup>-/-</sup> mutant  
176 [12]. Based on these findings, we propose that Stag1b and Stag2b are the main functional Stag1  
177 and Stag2 proteins in zebrafish.

178

## 179 **Cell division proceeds normally in early stage cohesin mutant embryos**

180 Loss of cohesin in *rad21*<sup>-/-</sup> homozygotes or *stag1b*<sup>-/-</sup>; *stag2b*<sup>-/-</sup> double mutants has different  
181 effects on *runx1* expression compared with viable mutations in *stag* genes. Therefore, we were  
182 curious to know whether cell cycle effects owing to cohesin deficiency could be responsible for  
183 gene expression changes, including *runx1*. Mitotic catastrophe occurs in embryos lacking

184 functional cohesin at 48 hpf (Fig. 1H,J) [12]. However, 16-somite *rad21*<sup>-/-</sup> homozygotes have  
185 sufficient maternally-deposited cohesin to continue growth for another 24 hours [12]. We chose to  
186 compare cell cycle progression in *stag2b*<sup>-/-</sup> homozygotes with *rad21*<sup>-/-</sup> homozygotes and  
187 heterozygotes to determine if these mutants alter cell cycle progression during early  
188 embryogenesis, the stage when *runx1* expression is disrupted.

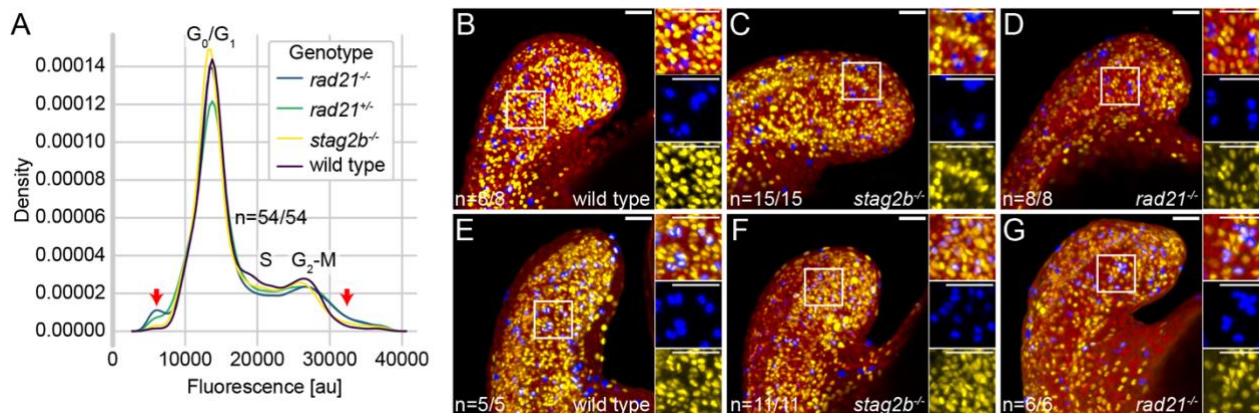

**Fig. 2. The cell cycle is not blocked in cohesin mutants at the 16-somite stage.** (A) Density plot (y-axis) showing the average signal of 3 replicates per genotype over fluorescence signal (DRAQ5, x-axis, artificial units). Red arrows indicate cells that are sub-G<sub>1</sub>, indicating potential chromosome loss, and cells that are >2n, indicating potential chromosome gain. (B-G) Confocal images showing S phases and M phases in wild type (B, E), *stag2b*<sup>-/-</sup> (C, F), and *rad21*<sup>-/-</sup> (D, G) tailbuds at ~16 hpf. S phases are detected with anti-BrdU (yellow) and M phases with anti-phH3 (blue) antibodies; nuclei are stained with Hoechst (red). BrdU incorporation was measured after incubation for 30 minutes (B-D) or 2 hours (E-G). Zoomed-in images of a selected area indicated by the box are shown. Images are maximum intensity projections of 33 (4.8 μm) optical sections. Scale bars are 40 μm.

189 Flow cytometry showed no significant differences in the proportions of cells in G<sub>1</sub> (2n), S  
190 (2-4n), and G<sub>2</sub>/M (4n) phases between cohesin deficient tailbuds and wild type controls (Fig. 2A).  
191 However, in both homozygous and heterozygous *rad21*<sup>-/-</sup> (but not *stag2b*<sup>-/-</sup>) embryos, we  
192 observed small populations of cells that were sub-G<sub>1</sub> or >2n, possibly reflecting chromosome loss  
193 and gain. Using BrdU incorporation to mark S phases and phosphorylated histone H3 (pH<sub>3</sub>)  
194 staining to mark G<sub>2</sub>/M cells, we found that S phase proceeds normally in cohesin mutants (Fig.  
195 2B-G). Moreover, the presence of cells double-positive for BrdU and pH<sub>3</sub> indicated that cells  
196 progressed from S to M phase in cohesin mutant tailbuds (Fig. 2E-G). We conclude that cell  
197 division proceeds essentially normally in all cohesin deficient embryos at the tailbud stage,  
198 consistent with previous findings that even when cohesin complex quantity is substantially  
199 reduced, there remains sufficient cohesin to progress through the cell cycle during early  
200 embryogenesis [12, 78].

201  
202



## 203 Cohesin complex quantity and composition affect tailbud gene transcription differently

204 The zebrafish embryonic tailbud contains neuromesodermal progenitors (NMPs) and  
205 midline progenitor cells (MPCs) as well as their neural and mesodermal derivatives (Fig. 3A) and  
206 therefore represents an ideal model to study changes in developmental gene transcription and cell  
207 fate decisions. Because Stag2 (rather than Stag1) is most likely to be involved in tissue-specific  
208 gene transcription [16, 65, 69, 83], we compared *stag2b* homozygous mutants with *rad21*  
209 homozygotes and heterozygotes to determine how the type of cohesin subunit mutation affects  
210 transcription in tailbuds. We performed bulk RNA-seq on 4 pools of 80 excised tailbuds from  
211 wild type, *rad21*<sup>-/-</sup>, *rad21*<sup>+/-</sup>, and *stag2b*<sup>-/-</sup> embryos stage-matched at 16 somites. Principal  
212 Component Analysis (PCA) separated samples into distinct groups based on their genotype (Fig.  
213 3B). PC1 accounts for 61% of the variance and separated samples into two groups: homozygous  
214 and heterozygous *rad21* mutants vs wildtype and *stag2b*<sup>-/-</sup> mutants. PC2 accounts for an  
215 additional 11% of the variance and separated *rad21* homozygotes from heterozygotes, and *stag2b*  
216 mutants from wild type.

217 Normalized transcript counts of the cohesin subunits in the different genotypes showed  
218 that *rad21* mutation is associated with reduced transcript counts of the other cohesin core  
219 subunits, *smc1a* and *smc3*, and increased transcript counts of *stag* subunits. In contrast,  
220 transcription of core subunits was unaffected or increased in *stag2b* mutants, and *stag1b* transcript  
221 counts increased (Fig. S2). The findings are consistent with the idea that *rad21* mutation reduces  
222 cohesin quantity while *stag2b* mutation alters cohesin composition. Differential gene expression  
223 analysis revealed that 7250 genes are dysregulated in *rad21* homozygotes (Fig. 3C), 5144 in  
224 *rad21* heterozygotes (Fig. 3D) and 2054 in *stag2b* homozygotes (Fig. 3E). Notably, survivable  
225 changes in cohesin dose (*rad21*<sup>+/-</sup>) and composition (*stag2b*<sup>-/-</sup>) strongly affect transcription in the  
226 tailbud, indicating that normal levels and subunit makeup of the cohesin complex are important  
227 for gene expression.

228 Of the shared significantly dysregulated genes in cohesin mutant tailbuds, 311 were  
229 upregulated and 312 were downregulated in all cohesin deficient tailbuds (Fig. S3A,B), with the  
230 highest overlap between *rad21*<sup>+/-</sup> and *rad21*<sup>-/-</sup>. Pathway enrichment analysis using Metascape  
231 showed that muscle organ development and energy metabolism were upregulated in all three  
232 genotypes, with the highest similarity between *rad21*<sup>+/-</sup> and *rad21*<sup>-/-</sup> (Fig. S3C). Of the  
233 downregulated gene pathways, none were conserved across all three genotypes, and more  
234 pathways were shared between *stag2b*<sup>+/-</sup> and *rad21*<sup>-/-</sup> than with *rad21*<sup>+/-</sup>. A significant number of  
235 terms were unique to *rad21*<sup>-/-</sup> tailbuds including regulation of cell fate specification, suggesting

236 possible dysregulation of tailbud progenitor differentiation (Fig. S3D). Pathway enrichment  
 237 analysis of significantly downregulated genes in *rad21*<sup>-/-</sup> tailbuds using Reactome revealed 26  
 238 significantly affected pathways, with top hits associated with mitosis and DNA damage repair  
 239 (Fig. S4). The most affected pathway was cell cycle control, with 165 genes significantly  
 240 downregulated in *rad21*<sup>-/-</sup>. Although this pathway did not reach a significance threshold in other

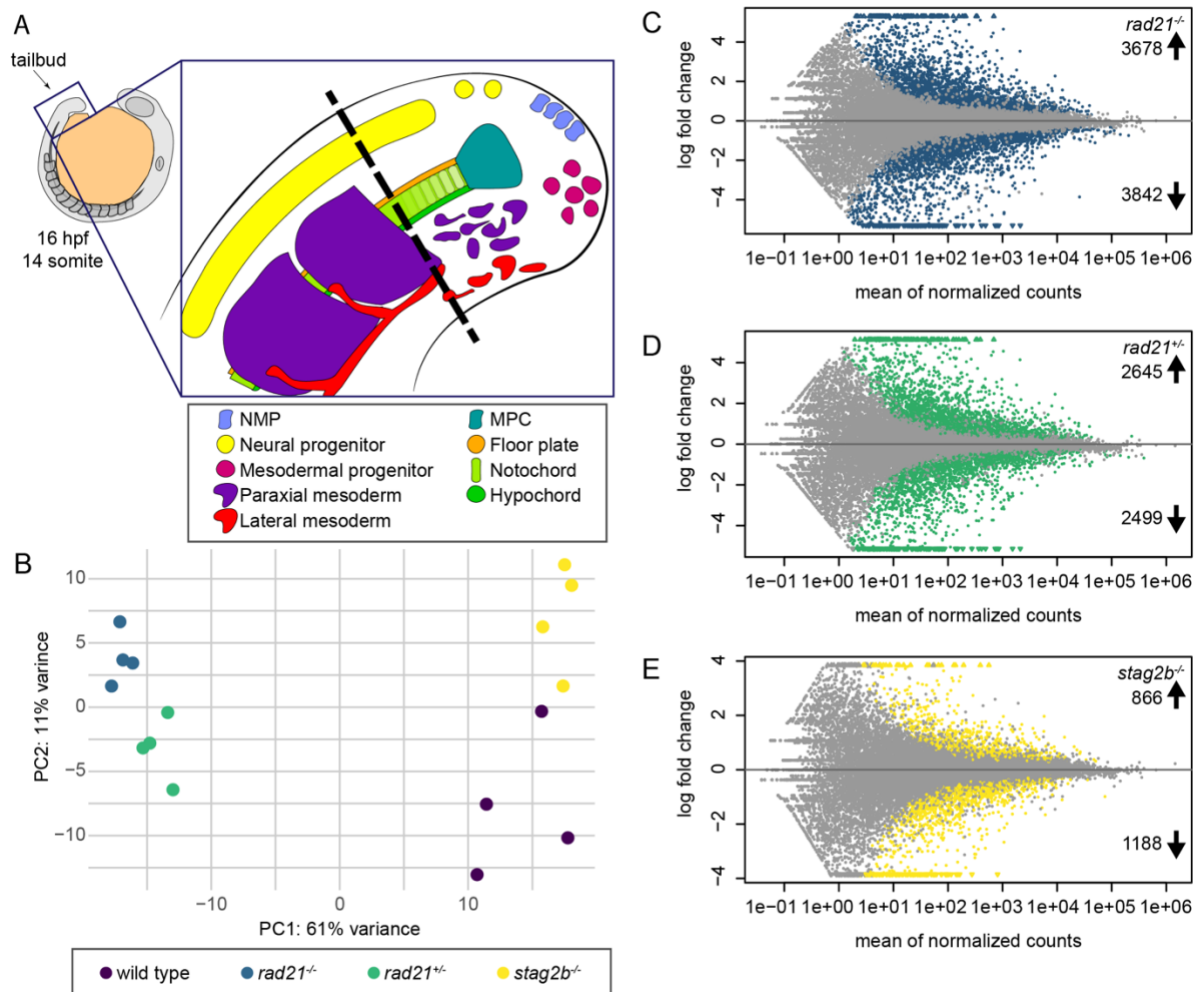

**Fig. 3. Bulk RNA sequencing analyses of Rad21- and Stag2b-deficient tailbuds.** (A) Schematic representation of progenitor cells and specialized tissues in the zebrafish tailbud. The zebrafish tailbud consists of two pools of bipotent progenitors: neuromesodermal progenitors (NMPs) and midline progenitor cells (MPCs). The dashed line shows the location of tailbud excision for RNA-seq. (B) Principal Component Analysis of gene expression in wild type and cohesin deficient tailbuds at the 16-somite stage. Genotypes are distinguished by colour: wild type samples are displayed in purple, *rad21*<sup>-/-</sup> in blue, *rad21*<sup>+/-</sup> in green, and *stag2b*<sup>-/-</sup> in yellow. (C-E) The MA (M (log ratio) and A (mean average) scales) plots display changes in gene expression in *rad21*<sup>-/-</sup> (C), *rad21*<sup>+/-</sup> (D), and *stag2b*<sup>-/-</sup> (E) compared to the wild type tailbuds. Each dot represents a gene, with colored dots indicating those with significant (5% false discovery rate, FDR) changes in expression. 7520 genes were dysregulated in *rad21*<sup>-/-</sup> tailbuds (3678 up- and 3842 downregulated), while 5144 genes were dysregulated in *rad21*<sup>+/-</sup> tailbuds (2645 up- and 2499 downregulated). In contrast, *stag2b*<sup>-/-</sup> tailbuds had substantially fewer dysregulated genes (2054: 866 up- and 1188 downregulated).

241 mutants, 79 cell cycle genes were significantly downregulated in *rad21*<sup>+/-</sup> and 13 in *stag2b*<sup>-/-</sup>  
 242 (Data S1-3).

243 The number of shared dysregulated genes between genotypes suggests that transcriptional  
 244 changes in *rad21*<sup>+/-</sup> mutants more closely resemble *rad21*<sup>-/-</sup> than *stag2b*<sup>-/-</sup> mutants (Fig. 3B).  
 245 Transcriptional changes reflect genotype rather than viability through to adulthood: *rad21*<sup>+/-</sup> and  
 246 *stag2b*<sup>-/-</sup> mutants are viable and *rad21*<sup>-/-</sup> mutants are not. Additionally, the results suggest that  
 247 despite normal cell cycle progression in *rad21* mutants during early embryogenesis (Fig. 2),  
 248 strong transcriptional changes relate to the expression of cell cycle genes in this genotype.

249

### 250 Subunit-specific effects of cohesin deficiency on transcription in tailbud cell populations

251 To assess how cohesin deficiency versus composition affects cell fate decisions in the  
 252 tailbud we used the bulk RNA-seq data to quantify the expression of genes that mark progenitor  
 253 cells and their derivatives. We used *rad21*<sup>-/-</sup> as a genotype that represents cohesin deficiency and  
 254 *stag2b*<sup>-/-</sup> as a genotype that corresponds to altered cohesin composition.

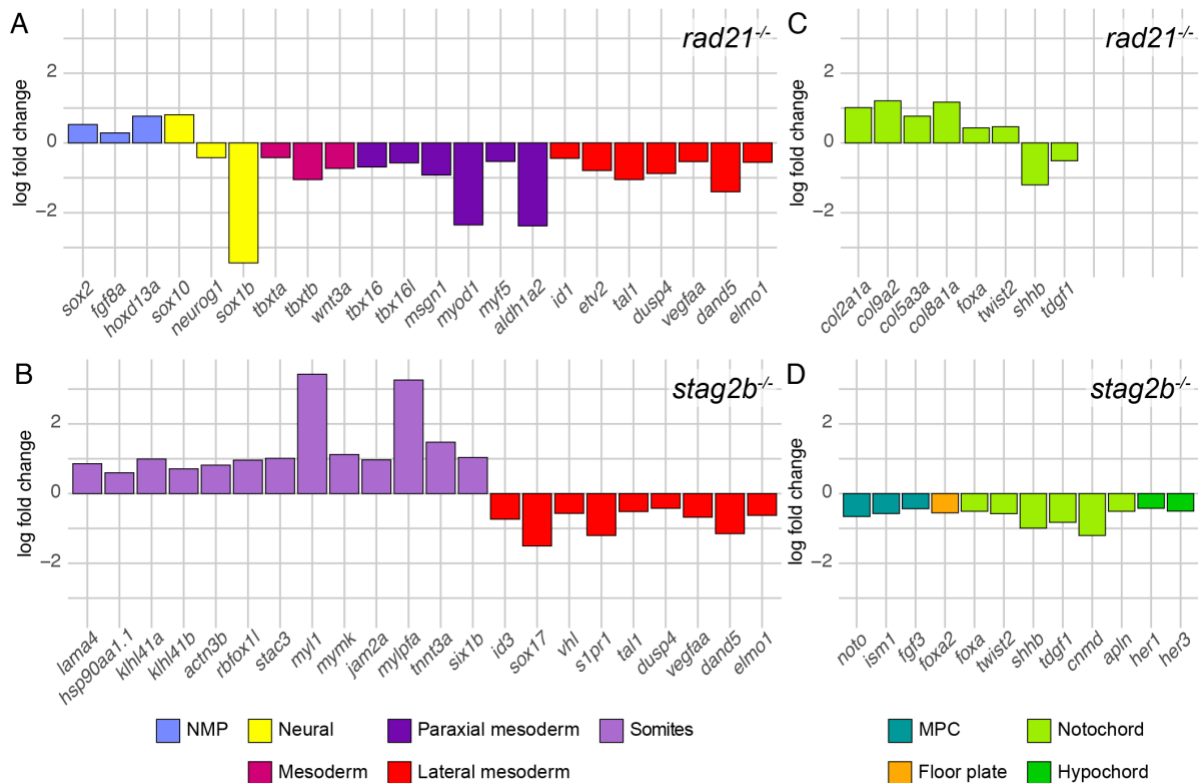

**Fig. 4. Expression of genes that mark progenitor cells and their derivatives in *rad21* and *stag2b* homozygous mutant tailbuds. (A-D)** The bar graphs display log<sub>2</sub> fold changes significantly (5% FDR) dysregulated marker genes in *rad21*<sup>-/-</sup> (A, C) and *stag2b*<sup>-/-</sup> (B, D) tailbuds compared to wild type. The different categories of marker genes are represented by different colors as specified in the key.

255 Tailbud NMPs give rise to mesoderm and neuronal fates, while MPCs give rise to  
256 floorplate, notochord and hypochord (Fig. 3A). In *rad21*<sup>-/-</sup> tailbuds, genes marking NMPs were  
257 upregulated, neural genes were dysregulated (both up- and downregulated) and genes marking all  
258 mesoderm fates were downregulated, including lateral mesoderm that may not derive from NMPs  
259 (Fig. 4A). In contrast, NMP and mesoderm marker genes were more subtly affected in *stag2b*<sup>-/-</sup>  
260 tailbuds, with non-significant downregulation of *tbxta*, *tbxtb*, *tbx16* and *msgn1* (see Fig. S5 for  
261 additional expression data). *stag2b*<sup>-/-</sup> tailbuds had increased expression of genes that mark mature  
262 somites and decreased expression of genes marking lateral mesoderm (Fig. 4B).

263 Genes that mark MPCs were expressed normally in *rad21*<sup>-/-</sup>. However, genes encoding  
264 notochord-specific collagens were upregulated, and some notochord markers were significantly  
265 dysregulated (Fig. 4C). In contrast, genes expressed in MPCs and midline tissues derived from  
266 MPCs were significantly downregulated in *stag2b*<sup>-/-</sup> tailbuds (Fig. 4D). The results suggest that  
267 *rad21* deficiency causes a block in NMP differentiation, while *stag2b* mutation either affects the  
268 composition of mesoderm, or mesoderm gene expression, in tailbuds. Moreover, *rad21* mutation  
269 had little effect on midline progenitors (with some effect on MPC derivatives) while *stag2b*  
270 mutation reduced transcription of genes expressed in MPCs and all derivatives.

## 271 272 ***rad21* and *stag2b* mutants have different tailbud phenotypes**

273 We next investigated if gene expression changes reflect gross developmental changes in  
274 the tailbud in *rad21* and *stag2b* mutants by imaging tailbud cell populations. NMPs are marked  
275 by *sox2* and *tbxta* co-expression (Fig. S6). MPCs, a thin band of cells at the end of the notochord,  
276 also co-express *sox2* and *tbxta*. Mesoderm progenitors express *tbxta* but not *sox2*, and  
277 differentiate into paraxial mesoderm, labelled by *tbx16* expression. *sox2* expression alone labels  
278 neural progenitors, lateral mesoderm, the floor plate, and the hypochord (Fig. 3A; Fig. S6) [81,  
279 84]. We used HCR RNA-FISH to visualize the distribution of *sox2*, *tbxta*, and *tbx16* transcripts in  
280 cohesin deficient tailbuds (Fig. 5).

281 In *rad21*<sup>-/-</sup> homozygotes (Fig. 5B compared with A) and in *stag1b*<sup>-/-</sup>; *stag2b*<sup>-/-</sup> double  
282 mutants (Fig. 5F compared with D) *sox2* expression was expanded at the posterior wall of the  
283 tailbud, and the zone of *sox2* expression extended into mesoderm progenitors accompanied by a  
284 reduction of *tbxta* expression in these cells. Expression of *tbx16* was restricted to a smaller area  
285 than in wild type. Approximately two-thirds of heterozygous *rad21*<sup>+/-</sup> embryos displayed similar  
286 expression changes, resembling homozygotes (Fig. 5C). Like *rad21* mutants, *stag2b*<sup>-/-</sup> mutants  
287 had expanded *sox2* expression in the posterior wall of the tailbud (Fig. 5E compared with D).



288 However, in *stag2b*<sup>-/-</sup>, *tbx16* expression appeared normal, while the notochord, visualized by *tbxta*  
 289 expression, was narrower and did not widen at the posterior end where MPCs reside. Ectopic  
 290 expression of *sox2* was also observed in this region (Fig. 5E).

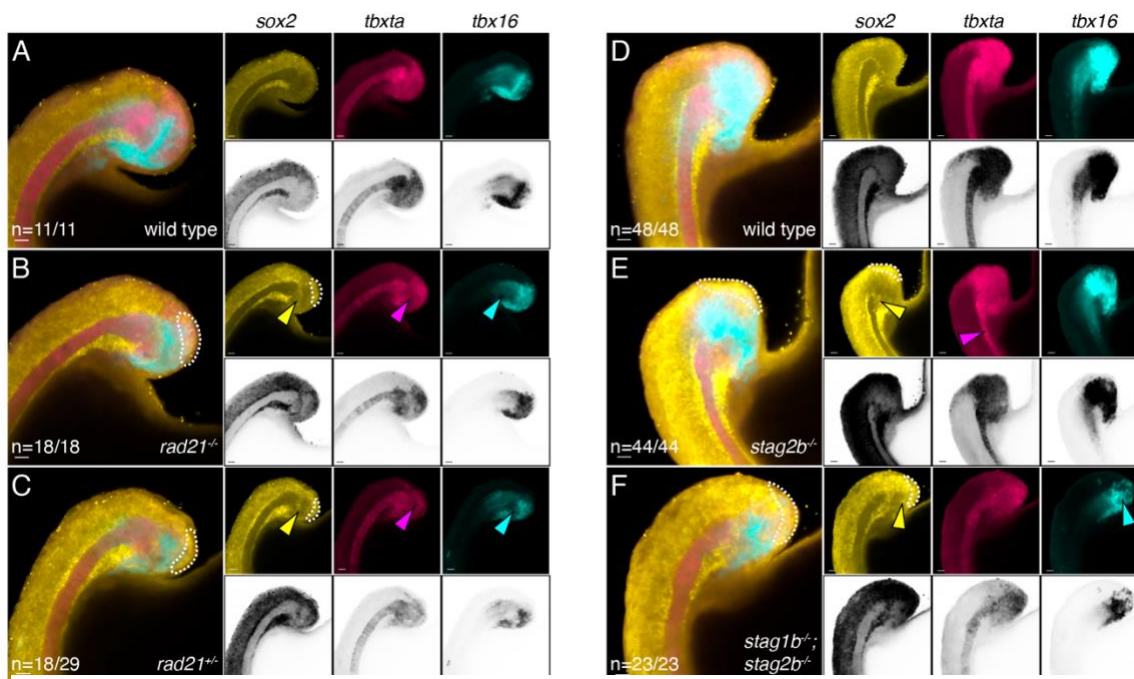

**Fig. 5. Distribution of *sox2*, *tbxta*, and *tbx16* transcripts in cohesin-deficient tailbuds.** (A, D) wild type, (B) *rad21*<sup>-/-</sup>, (C) *rad21*<sup>+/-</sup>, (E) *stag2b*<sup>-/-</sup>, and (F) *stag1b*<sup>-/-</sup>; *stag2b*<sup>-/-</sup> zebrafish tailbuds at the 16-somite stage showing expression of *sox2* (yellow), *tbxta* (magenta), and *tbx16* (cyan). Increased *sox2* expression in the NMP region is outlined with a dashed line, yellow arrows indicate ectopic expression of *sox2* and pink arrows point to the loss of *tbxta* expression in the region of mesodermal induction (B, C) and the narrow notochord (E), while cyan arrows indicate a decrease in *tbx16* expression. Images are maximum intensity projections of 3 (4.8 μm) optical sections. Scale bars are 20 μm. The number of embryos with each expression pattern out of the total analyzed is noted at the bottom left of the merged panels.

291

292 We measured the thickness of the notochord (as defined by *tbxta* expression) in wild-type  
 293 and cohesin-deficient embryos (Fig. 6A,B) and confirmed that notochords were significantly  
 294 narrower ( $p \leq 0.0001$ ) in *stag2b*<sup>-/-</sup> embryos (Fig. 6C). In contrast, notochord width in *rad21*  
 295 homozygous and heterozygous embryos was similar to wild type (Fig. 6C). Surprisingly, *stag1b*<sup>-/-</sup>  
 296 ; *stag2b*<sup>-/-</sup> double mutant embryos had notochords that were normal width (Fig. 5F; Fig. 6C).  
 297 Therefore, the narrow notochord phenotype was unique to *stag2b*<sup>-/-</sup>, suggesting that the loss of  
 298 Stag2b impacts MPC differentiation. Strikingly, this phenotype is “rescued” in *stag1b*<sup>-/-</sup>; *stag2b*<sup>-/-</sup>  
 299 mutants, suggesting that complete cohesin loss is epistatic to the narrowed notochord in *stag2b*<sup>-/-</sup>  
 300 mutants.



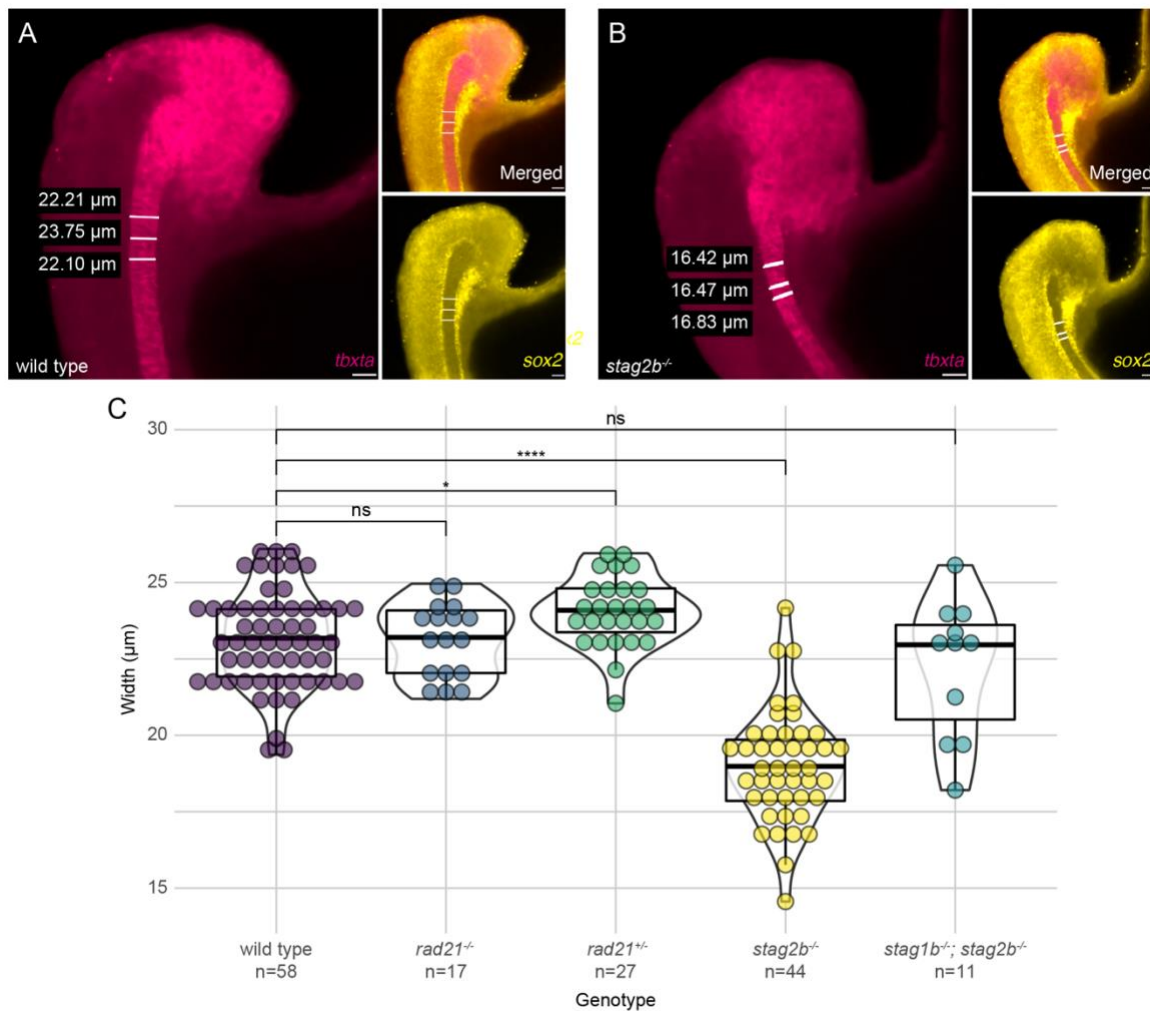

**Fig. 6. Narrower notochords in *stag2b* mutants are rescued by additional *stag1b* mutation. (A, B) Example of notochord width measurement using *tbxta* expression and absence of *sox2* expression. The scale bar is 20  $\mu\text{m}$ . (C) Violin plots with overlaid box plots visualizing measurements of notochord width. The genotype and the number of embryos measured in each group are indicated on the x-axis. Significance was determined using an unpaired t-test: \*  $p < 0.05$ , \*\*\*\*  $p < 0.0001$ .**

301 Altogether, our results indicate that different cohesin mutations have different effects on  
 302 cell populations in the tailbud. Loss of cohesin quantity in *rad21* mutants and *stag1b*<sup>-/-</sup>; *stag2b*<sup>-/-</sup>  
 303 double mutants caused reduction of *tbx16* and expansion of *sox2* expression, consistent with lack  
 304 of mesoderm induction. In contrast, *stag2b* mutation (which alters cohesin composition) leads to a  
 305 narrower notochord.

306

307 **Altered cell populations in *stag2b*<sup>-/-</sup> tailbuds likely result from downregulated Wnt signaling**  
 308 **in NMPs**

309 Transcription dysregulation in homozygous and heterozygous *rad21* tailbuds is strongly  
 310 associated with the cell cycle and developmental changes in the tailbud indicate a block in NMP  
 311 differentiation. In contrast, transcription dysregulation in *stag2b*<sup>-/-</sup> tailbuds has no cell cycle  
 312 association yet these mutants appear to have altered mesoderm and notochord gene expression  
 313 together with physical changes to the notochord. It is possible that altered cohesin composition

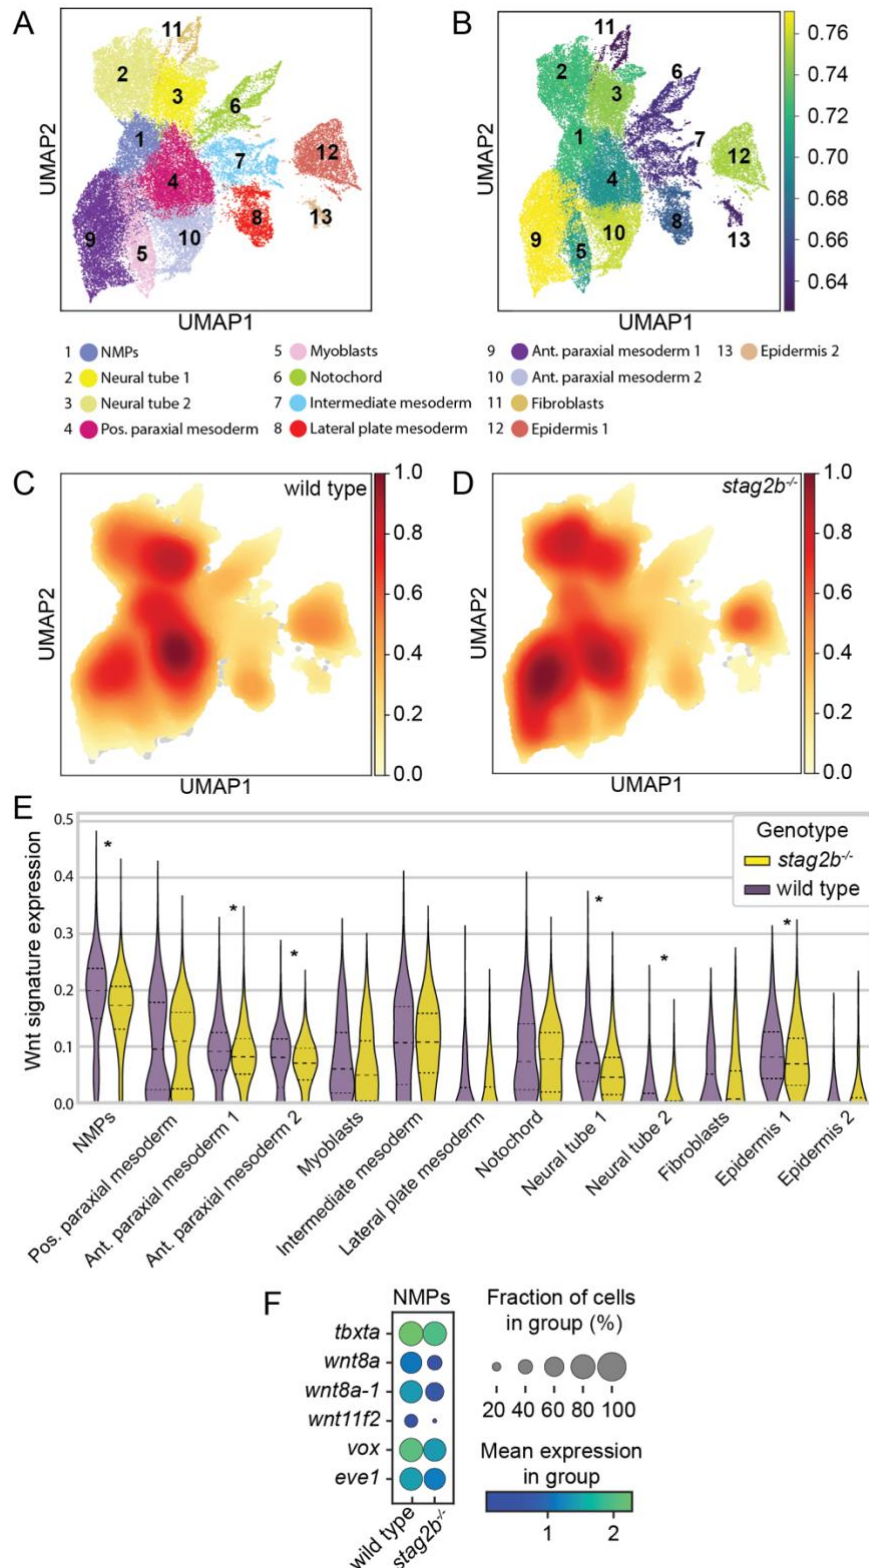

**Fig. 7. Single cell RNA-seq of tailbuds from embryos at the 16-somite stage shows disruption of Wnt signaling in *stag2b*<sup>-/-</sup> NMPs.** (A) Uniform manifold approximation and projection (UMAP) dimensional reduction of two integrated datasets of wild type (15,298 cells) and *stag2b*<sup>-/-</sup> (21,278 cells) tailbud samples (total 36,576 cells) with clustering of the major cell types. (B) UMAP representation of gene expression differences in *stag2b*<sup>-/-</sup> tailbuds calculated using Augur area under the receiver operating characteristic curve (AUC). The AUC ranges from 0 to 1, where values closer to 0.7 denote more minor differences in the *stag2b*<sup>-/-</sup> genotype (purple shades), and values closer to 1 denote larger changes in the *stag2b*<sup>-/-</sup> genotype (yellow shades). Visualization of the average cell density within wild type (C) and *stag2b*<sup>-/-</sup> (D), using embedding density. Darker colors (red) correspond to denser regions. (E) Violin plot of Wnt gene expression signature (log-normalized) among different cell types in *stag2b*<sup>-/-</sup> (yellow) and wild type (purple) embryos. Wilcoxon rank-sum test with 5% FDR. (F) Dot plot showing the mean expression of differentially expressed Wnt ligands in the NMP cluster in wild type and *stag2b*<sup>-/-</sup> embryos.

314 through *stag2b* mutation has unique, cell cycle-independent effects on cell fate in the tailbud. We  
315 chose to investigate this possibility further using single-cell RNA-sequencing of *stag2b*<sup>-/-</sup> tailbuds  
316 compared with wild type at the 16-somite stage.

317 We integrated the single-cell RNA-seq datasets from wild type and *stag2b*<sup>-/-</sup> tailbud and  
318 annotated clusters representing major cell types based on their gene expression profiles (Fig.  
319 S7A). All annotated clusters were present in both wild type and *stag2b*<sup>-/-</sup> samples (Fig. 7A),  
320 although in slightly different proportions (Fig. S7B). The biggest changes in cell frequencies in  
321 *stag2b*<sup>-/-</sup> tailbuds compared to the wild type were evident in the anterior paraxial mesoderm 1  
322 cluster (Fig. S7B). Although changes in other clusters were minor, they did reflect the variation in  
323 expression of cell type-specific markers observed in the bulk RNA-seq analysis (Fig. 4C,D).

324 Subsequently, we examined the gene expression differences within each cluster between  
325 the two genotypes (Fig. 7B). The clusters representing anterior paraxial mesoderm 1 and 2  
326 displayed the most significant differences in gene expression between wild type and *stag2b*<sup>-/-</sup>  
327 samples, whereas the notochord, intermediate mesoderm, fibroblast and epidermis 2 clusters  
328 exhibited the least difference in gene expression profiles. Additionally, the cell density UMAPs  
329 indicated increased densities in anterior paraxial mesoderm 1 cluster (Fig. 7C, D). Collectively,  
330 these results suggest that the biggest changes in cell proportion and gene expression within each  
331 cell occur within the paraxial mesoderm lineage in the *stag2b*<sup>-/-</sup> tailbuds.

332 Given that midline mesoderm forms from NMPs, we analyzed the top 25 differentially  
333 expressed genes in this cluster (Fig. S8, Data S4) with *wnt8a* being among the most  
334 downregulated in *stag2b*<sup>-/-</sup>. The important role of Wnt signaling in NMP differentiation and  
335 mesoderm formation prompted us to explore the Wnt gene expression signatures (Data S5) across  
336 various cell types. We observed significant downregulation of Wnt signatures in the NMPs and  
337 anterior paraxial mesoderm clusters (Fig. 7E, Data S6). *tbxta* and Wnt ligands (*wnt8a*, *wnt8a-1*  
338 and *wnt11f2*) were downregulated in the NMPs, as well as Wnt responsive genes *vox* and *eve1*  
339 (Fig. 7E-F). In summary, our results suggest that mesoderm formation from the NMPs is  
340 dysregulated in *stag2b*<sup>-/-</sup> tailbuds and these observed changes may be due to downregulation of  
341 Wnt signaling in these cell types.

### 342 343 **Wnt stimulation rescues transcription in *stag2b* but not *rad21* mutant tailbuds**

344 We next determined whether Wnt stimulation could restore transcription in cohesin  
345 deficient tailbuds. We performed RNA-seq on tailbuds of embryos treated from shield stage to  
346 16-somite stage with the Wnt agonist, BIO (6-bromoindirubin-3'-oxime), which is a GSK3

347 inhibitor. Subsequently, we conducted interaction analysis (combined effect of genotype and

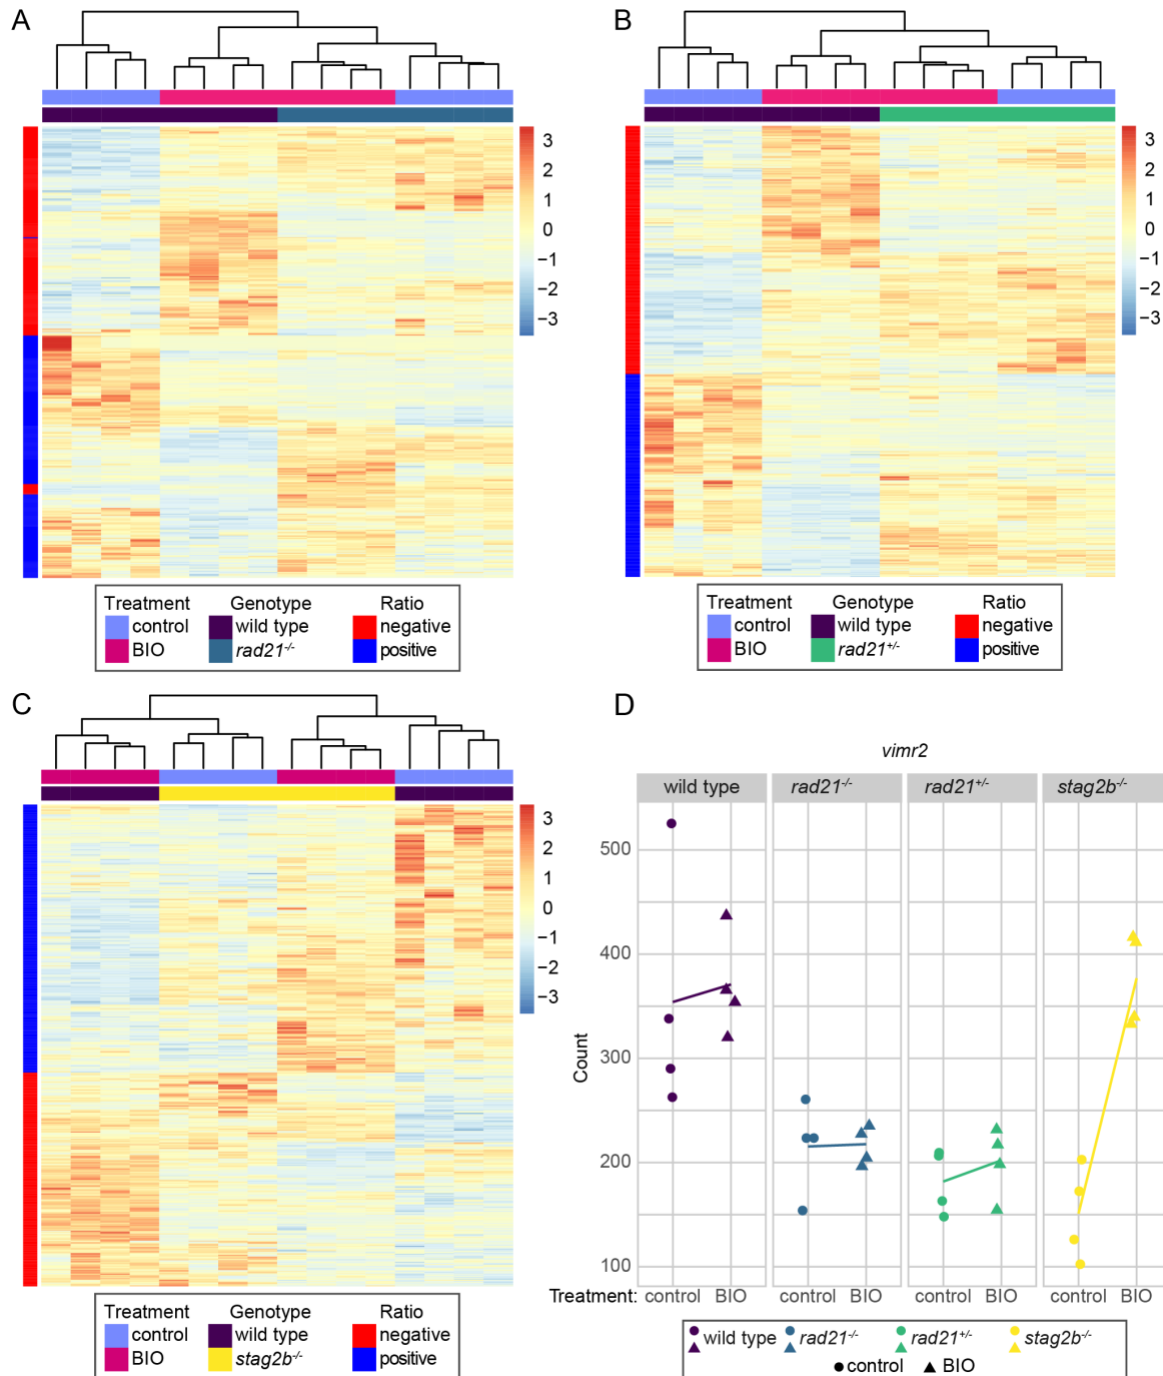

**Fig. 8. Wnt stimulation normalizes gene expression in *stag2b*<sup>-/-</sup> but not in *rad21*<sup>-/-</sup> or *rad21*<sup>+/-</sup> tailbuds.** Embryos were treated from shield stage with 2.5  $\mu$ M BIO, then tailbuds were collected at 16 somites. 4 replicate pools of 80 tailbuds were used per condition for RNA-seq. The heatmaps display expression levels of the genes that responded differently to BIO stimulation in cohesin mutant genotypes compared with wild type as determined by an interaction analysis. Heatmaps display results from 4 replicates of (A) *rad21*<sup>-/-</sup>, (B) *rad21*<sup>+/-</sup>, and (C) *stag2b*<sup>-/-</sup> versus wild type. Red and blue colors indicate upregulation and downregulation, respectively, compared to the mean expression. (D), *vimr2* expression is rescued by BIO stimulation in *stag2b*<sup>-/-</sup> but not in *rad21*<sup>-/-</sup> or *rad21*<sup>+/-</sup>. Dot plots illustrate the transcript counts of *vimr2* in wild type (purple), *rad21*<sup>-/-</sup> (blue), *rad21*<sup>+/-</sup> (green), and *stag2b*<sup>-/-</sup> (yellow). The x-axis indicates the treatment status, and the y-axis represents the normalised counts. Lines connect the means of the counts for each sample group.



348 treatment) to identify genes exhibiting differential responses to Wnt stimulation in cohesin  
349 deficient tailbuds compared to wild type. Heatmaps were used to display clustering of the  
350 differentially responsive genes (Fig. 8A-C).

351 In *rad21*<sup>-/-</sup> and *rad21*<sup>+/-</sup>, the genotype had a stronger effect on clustering of differentially  
352 responsive genes than BIO treatment. Genes identified as responding differently to BIO treatment  
353 in *rad21* mutants compared to wild type (395 in *rad21*<sup>-/-</sup> and 467 in *rad21*<sup>+/-</sup>) cluster together in  
354 the dendrograms regardless of BIO treatment (Fig 8. A, B). Primarily, expression of these genes  
355 differs from wild type by being strongly responsive to BIO in wild type, and much less responsive  
356 to BIO with homozygous or heterozygous *rad21* mutation. In *stag2b*<sup>-/-</sup> much more complex  
357 interactions were observed between the genotype and BIO treatment. In the dendrograms of genes  
358 differentially responsive to BIO (539 genes), untreated *stag2b*<sup>-/-</sup> gene sets cluster with BIO-treated  
359 wild type, and BIO-treated *stag2b*<sup>-/-</sup> gene sets cluster with untreated wild type (Fig. 8C). This  
360 suggests that there is an altered baseline of Wnt signaling in *stag2b*<sup>-/-</sup> and also that BIO  
361 stimulation normalizes the expression of select dysregulated genes in *stag2b*<sup>-/-</sup> tailbuds.

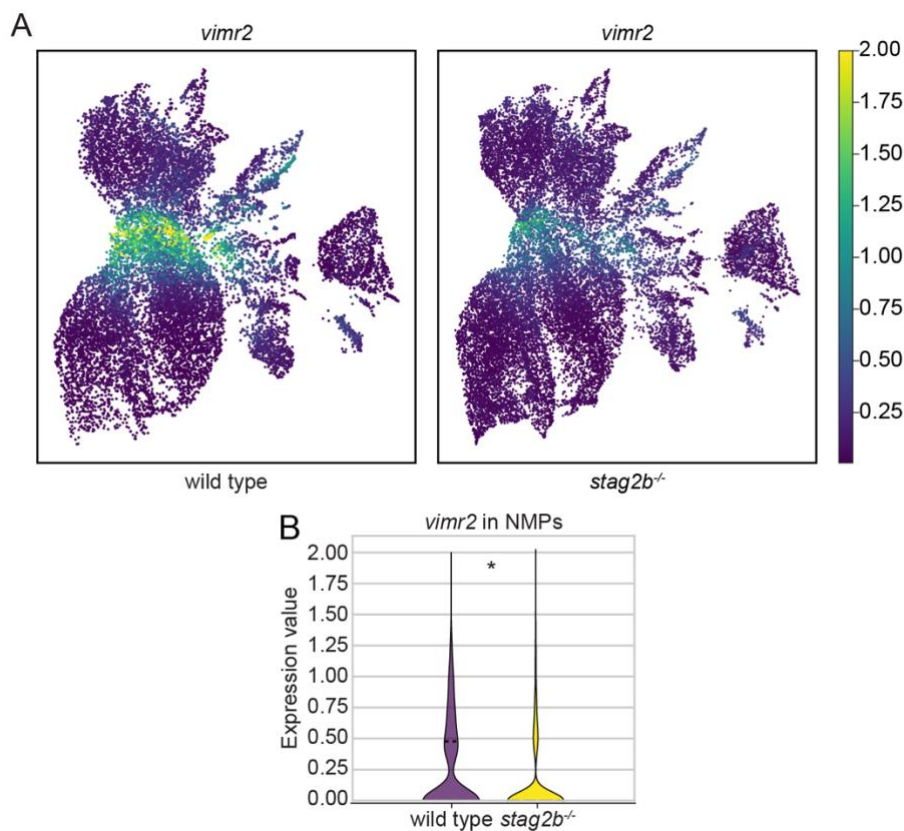

**Fig. 9. *stag2b* mutation affects *vimr2* expression in NMPs.** (A) Expression of *vimr2* in UMAP representation in wild type and *stag2b*<sup>-/-</sup> tailbuds at 16 somites. (B) Violin plot showing downregulation of *vimr2* expression in the NMPs in *stag2b*<sup>-/-</sup>. \* p < 0.005, Wilcoxon rank-sum test.



362 A notable example of a gene with expression that is rescued by BIO in *stag2b*<sup>-/-</sup> but not in  
363 *rad21* mutants is *vimr2*, a marker of epithelial-to-mesenchymal transition (EMT) and mesoderm  
364 formation in the tailbud [85]. Expression of *vimr2* was strongly downregulated in all cohesin  
365 mutant tailbuds (Fig. 8D, Fig. S9). While BIO treatment had a minimal effect on *vimr2* transcript  
366 counts in wild type and *rad21* mutants, it restored *vimr2* levels in *stag2b*<sup>-/-</sup> tailbuds to wild type  
367 (Fig. 8D). Interestingly, our single cell RNA-seq data show that *vimr2* is expressed in NMPs and  
368 is significantly downregulated in *stag2b*<sup>-/-</sup> mutants (Fig. 9AB). This finding raises the possibility  
369 that EMT anomalies marked by downregulated *vimr2* could be responsible for changes in  
370 mesoderm induction in *stag2b*<sup>-/-</sup>.

371

### 372 Wnt stimulation rescues notochord width in *stag2b*<sup>-/-</sup> tailbuds

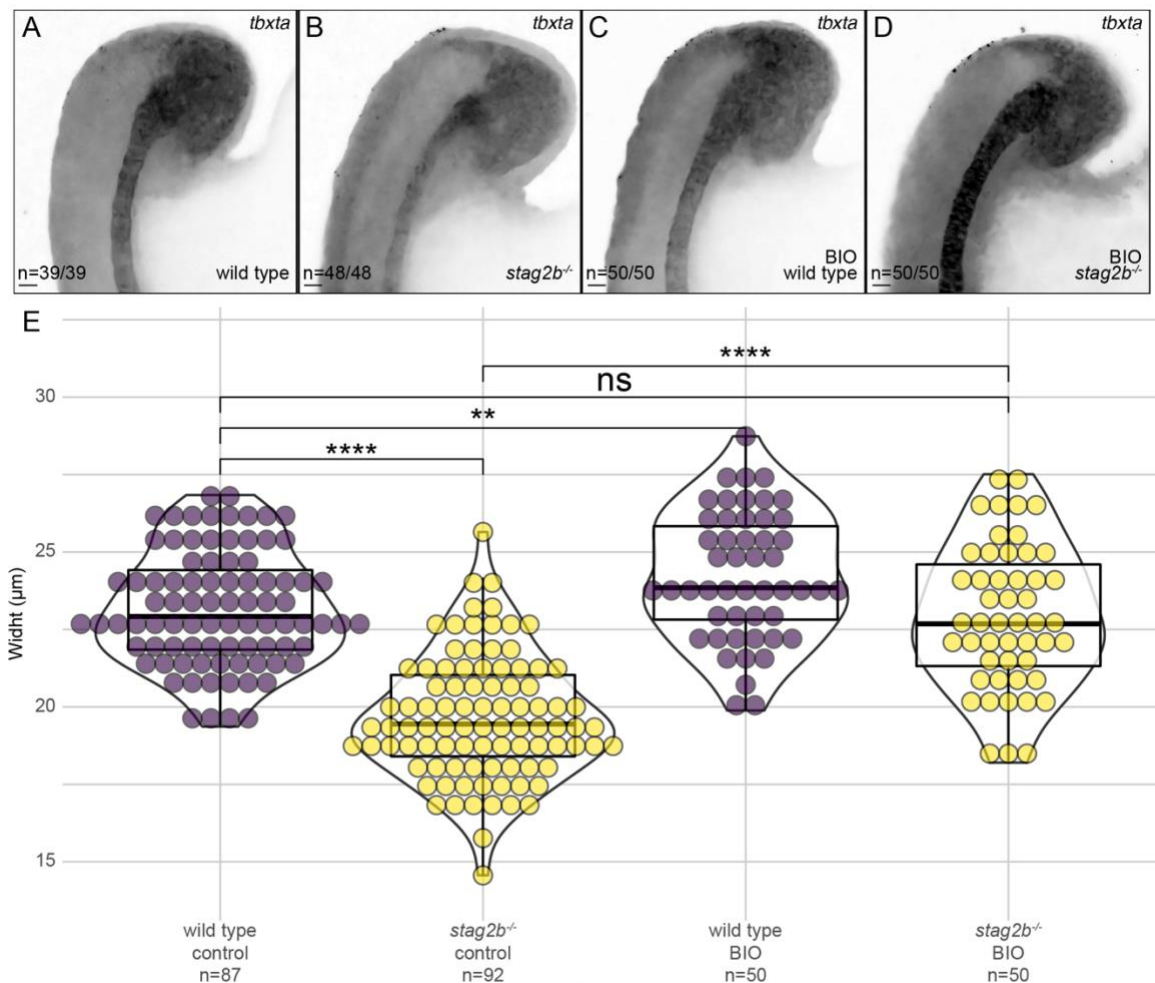

**Fig. 10. Wnt stimulation rescues notochord width in *stag2b*<sup>-/-</sup>.** (A-D) Expression pattern of *tbxta* in wild type (A, C) and *stag2b*<sup>-/-</sup> (B, D) zebrafish tailbuds with (C, D) and without (A, B) Wnt stimulation. Images are maximum intensity projections of 3 (4.8 µm) optical sections. Scale bars are 20 µm. The number of embryos with each expression pattern out of the total analyzed is noted. (E) Violin plots with overlaid box plots visualizing measurements of notochord width. The x-axis indicates the genotype, treatment status and the number of embryos measured in each group. Significance was determined using an unpaired t-test: \*\* p < 0.01, \*\*\*\* p < 0.0001.

373 If BIO stimulation can restore transcription in *stag2b*<sup>-/-</sup> tailbuds, we reasoned that it may  
374 also rescue the narrower notochord phenotype in *stag2b*<sup>-/-</sup> embryos. Using HCR with probes for  
375 *sox2*, *tbxta*, and *tbx16*, we quantified the thickness of the notochord (*tbxta*) in wild-type and  
376 *stag2b*<sup>-/-</sup> embryos both with and without BIO treatment (Fig. 10, Fig. S10). While Wnt stimulation  
377 modestly increased notochord width in wild type ( $p \leq 0.01$ ), it significantly increased the width in  
378 *stag2b*<sup>-/-</sup> embryos ( $p \leq 0.0001$ ) (Fig. 10E). When we compared the notochord width in wild type  
379 embryos to that in *stag2b*<sup>-/-</sup> embryos treated with BIO, the difference was statistically  
380 insignificant. Therefore, Wnt stimulation rescues the notochord phenotype in *stag2b*<sup>-/-</sup> embryos.

381 In summary, our findings suggest that Wnt stimulation with BIO normalizes gene  
382 expression and phenotype in *stag2b*<sup>-/-</sup> embryos, while gene expression in *rad21* mutants is  
383 unresponsive to Wnt stimulation.

384

## 385 Discussion

386 Germline mutations in subunits of the cohesin complex or its regulators are implicated in  
387 developmental disorders known as cohesinopathies, and somatic mutations are now known to  
388 cause a variety of cancers. Such cohesin mutations are invariably partial loss-of-function rather  
389 than null alleles, because of the essential cell cycle role of cohesin. To date, few studies have  
390 compared the developmental consequences of reducing the overall amount of cohesin versus  
391 altering its composition. Upon deficiency of Stag2, the Stag1 subunit will compensate in the  
392 cohesin complex thereby altering cohesin composition. Upon deficiency of Rad21, the overall  
393 quantity of cohesin complexes on DNA decreases. In this study, we took advantage of *stag* and  
394 *rad21* gene mutations in zebrafish to show that cohesin composition versus quantity lead to  
395 strikingly different consequences for gene transcription and cell differentiation.

396 Rad21 is an essential subunit in the cohesin complex. Using a zebrafish point mutation  
397 *rad21*<sup>nz171</sup> that progressively reduces *rad21* transcript from heterozygotes to homozygotes, we  
398 show that Rad21 deficiency dose-dependently correlates with downregulation of core cohesin  
399 subunits, a transcriptional dysregulation signature enriched in cell cycle genes, and a block in  
400 mesoderm induction in the tailbud. Although *rad21* heterozygotes are viable and fertile,  
401 developmental anomalies in the tailbud are more similar between heterozygotes and *rad21*  
402 homozygotes (which die by 48 hpf) than homozygous viable *stag2b*<sup>-/-</sup>. Additional mutation of  
403 *stag1b* on top of *stag2b* resulted in loss of viability and a phenotype resembling *rad21* mutants.

404 It is not clear whether the consequences of Rad21 deficiency are related to cell cycle  
405 effects. A recent study showed that blocking the cell cycle in zebrafish does not affect the

406 development of cell types [86], although it does affect the numbers of presomitic mesoderm cells  
407 and erythrocytes [86]. Consistent with cell cycle effects, we observed that *rad21* mutation impacts  
408 mesoderm differentiation and our previous work has shown that erythropoiesis is downregulated  
409 in cohesin mutants [12, 77]. However, cell cycle impairment is unlikely to account for all the  
410 defects associated with the reduction in cohesin dose, and it does not explain the transcriptional  
411 and phenotypic changes observed in a viable, fertile *rad21* heterozygotes. Our previous work has  
412 shown that Rad21 deficiency has remarkably specific transcriptional and developmental  
413 consequences, for example, cell-type specific loss of *runx1* expression [12, 78, 87]. Consistent  
414 with a non-cell cycle related transcriptional role for Rad21, complete removal of Rad21 interferes  
415 with transcription in post-mitotic neurons, which is rescued upon restoring Rad21 [88].

416 In contrast, homozygous mutation in *stag2b* has no discernible effect on the cell cycle.  
417 Although *stag2b*<sup>-/-</sup> mutants are viable and fertile, changes in mesoderm differentiation are  
418 apparent at tailbud stages. Single cell sequencing of tailbuds shows that the proportions of  
419 mesoderm in the tailbud are subtly altered, and the EMT driver *vimr2* is downregulated in NMPs.  
420 Genes in the Wnt signaling pathway are altered in NMPs and in paraxial mesoderm. The  
421 noticeably narrower notochord in *stag2b*<sup>-/-</sup> mutants is rescued by stimulation of Wnt signaling via  
422 inhibition of GSK3. Moreover, transcription in *stag2b*<sup>-/-</sup> mutant tailbuds is rescued to wild type  
423 upon GSK3 inhibition. Our results suggest that disrupted Wnt signaling likely accounts for  
424 transcriptional and phenotypic changes in the *stag2b*<sup>-/-</sup> mutants. Notably, Wnt stimulation does  
425 not rescue transcription in *rad21* genotypes. This suggests that reduced cohesin dose is epistatic to  
426 altered cohesin composition.

427 We and others have previously reported dysregulated Wnt signaling upon cohesin  
428 mutation [78, 89-93] but the directionality of Wnt signaling disturbance remains unclear. We have  
429 shown stabilization of  $\beta$ -catenin and both up- and downregulation of components of the Wnt  
430 signaling pathway, indicating that the effects of cohesin deficiency on Wnt are likely to be  
431 complex [90]. Interestingly, GSK3 $\alpha$  inhibition was shown to stabilize cohesin on chromatin,  
432 promoting continued loop extrusion [94]. Stabilized loop extrusion is dependent on cohesin as it  
433 was eliminated with knockdown of Rad21 [94]. The compound (BIO) we used to stimulate Wnt  
434 inhibits GSK3 and does not distinguish between  $\alpha$  and  $\beta$  forms. It is possible that GSK3  
435 inhibition was able to rescue transcription and phenotypes in *stag2b*<sup>-/-</sup> mutant tailbuds but not in  
436 *rad21* mutants because a reduction in Rad21 reduces the number of complexes that can be  
437 stabilized, whereas Stag1b compensates for loss of Stag2b in those complexes.

438 Stag1-containing cohesin resides primarily at CTCF sites that demarcate contact domains  
439 that are invariant between tissues. Stag2-containing cohesin resides at CTCF and non-CTCF sites,  
440 where it is thought to regulate tissue-specific transcription [16, 65, 69, 83]. Viny et al (2019)  
441 showed that Stag1-cohesin cannot fully substitute for Stag2 cohesin in haematopoietic stem cells.  
442 It is possible that Stag1-containing cohesin has different properties in loop extrusion than Stag2  
443 cohesin [16, 95] and likely that developmental gene transcription in *stag2b*<sup>-/-</sup> mutant tailbuds is  
444 altered because of compensation by Stag1b. We do not believe the other Stag orthologs are major  
445 contributors to development in zebrafish owing to the lethality of *stag1b*<sup>-/-</sup>; *stag2b*<sup>-/-</sup> double  
446 mutants.

447 Stag proteins may have functions that are independent of the cohesin complex. For  
448 example a recent study found that upon RAD21 depletion, STAG proteins remain bound to  
449 chromatin, interact with CTCF, and cluster in 3D [67]. STAG proteins interact with RNA and R-  
450 loops even in the absence of cohesin. Drosophila's SA cohesin subunit (equivalent to Stag2) is  
451 differentially enriched at enhancers and promoters near origins of replication where it is proposed  
452 to recruit cohesin [70]. In contrast, RAD21 appears to be key for stable binding of cohesin at  
453 CTCF sites. A recent study showed that when RAD21 is cleaved, cohesin is released from DNA  
454 including at CTCF sites and loops at these elements are lost [55]. Interestingly CTCF-independent  
455 cohesin-anchored loops within chromatin domains persisted despite RAD21 cleavage. The  
456 different molecular and structural behaviour of RAD21 and STAG proteins is consistent with the  
457 diverse developmental consequences we observed upon germline mutation in these genes.

458 It is possible that some of the molecular basis for developmental abnormalities is shared  
459 between NIPBL deficiency and STAG2 mutation. A recent preprint describing single cell RNA  
460 sequencing of early-stage mouse embryos with one deleted copy of *Nipbl* showed that these  
461 embryos also experience changes in mesoderm fate and have altered mesoderm cell populations  
462 [96]. *Nipbl* loss altered the regulation of genes involved in EMT, which parallels our findings in  
463 *stag2b* mutant zebrafish embryos. This raises the possibility that abnormal regulation of  
464 mesoderm fate could be a conserved feature of the cohesinopathies.

465 Alternate transcriptional and developmental consequences with Stag2 and Rad21  
466 deficiency have implications for the amelioration of cohesinopathies where Wnt agonists have  
467 been explored as potential therapeutic agents for individuals with CdLS [91], and additionally, for  
468 the treatment of cohesin-mutant cancers [90]. Our results suggest that reducing cohesin dose has  
469 very different consequences to altering cohesin composition. This indicates that mutations in core

470 cohesin subunits need to be considered differently to mutations in alternate cohesin subunits or  
471 cohesin regulators when developing therapeutics.

472

## 473 **Materials and Methods**

474

### 475 **Zebrafish Husbandry**

476 Wild type (WIK) [97], *stag1a*<sup>nz204</sup> [77], *stag1b*<sup>nz205</sup> [77], *stag2b*<sup>nz207</sup> [77] and *rad21*<sup>nz171</sup>  
477 [12] zebrafish lines were maintained at 28 °C according to established husbandry methods [98].  
478 Zebrafish were housed in the Otago Zebrafish Facility (Department of Pathology, University of  
479 Otago, Dunedin, New Zealand). All animal work was performed in accordance with the Otago  
480 Zebrafish Facility Standard Operating Procedures (AUP 21-110) and under Environmental Risk  
481 Management Authority approval numbers GMC005627, GMD100922 and GMC001366. For all  
482 experiments, embryos were developed at 22 or 28 °C.

483

### 484 **Whole-mount *in situ* hybridisations (WISH) and hybridization chain reaction (HCR) RNA-** 485 **FISH**

486 WISH for *runx1* was performed using 0.5 ng/μL of riboprobe as previously described  
487 [82]. Probes for *sox2*, *tbxta*, and *tbx16* and HCR reagents were purchased from Molecular  
488 Instruments, Inc (USA). HCR was performed according to the manufacturer's protocol for  
489 zebrafish embryos.

490

### 491 **Flow cytometry**

492 Embryos at the 16-somite stage were fixed in methanol [99] and tailbuds were dissected  
493 (n=30). *rad21* heterozygotes and homozygotes were identified by genotyping the heads of  
494 individual embryos using genomic DNA extraction [100] followed by a custom TaqMan assay.  
495 Cells were filtered through a 40 μm cell strainer and nuclei were stained with DRAQ5  
496 (#ab108410, Abcam) at 5 μM final concentration on ice for 45 min in the dark. Cell cycle profiles  
497 of three independent replicates for each genotype were obtained using a BD FACS Aria III (BD  
498 Biosciences). Data analysis and plots were generated using Cytoflow [101].

499

### 500 **BrdU incorporation**



501 For cell cycle analyses dechorionated embryos were incubated in 10 mM BrdU in  
502 Ringer's solution for 30 minutes on ice, rinsed three times with Ringer's solution and incubated  
503 for 30 minutes or 2 hours at 28 °C. Embryos were fixed with 4% PFA overnight at 4 °C,  
504 dehydrated in methanol and stored at -20 °C in 100% MeOH.

505 For staining, embryos were rehydrated in a series of 5-minute washes with PBST/MeOH.  
506 Embryos older than 24 hpf were treated with 10 µg/ml proteinase K for 10 minutes, followed by  
507 three 5-minute washes in PBST and post-fixation in 4% PFA for 20 minutes at room temperature.  
508 Samples were then rinsed three times with sterile distilled water. For BrdU staining, embryos  
509 were rinsed twice in 2 N HCl and incubated in 2 N HCl for 1 hour at room temperature to  
510 denature DNA and expose the BrdU epitope. Alternatively, for antigen exposure, embryos were  
511 treated with acetone for 20 minutes on ice.

512

### 513 **Immunohistochemistry**

514 Samples were rinsed twice with sterile distilled water and washed twice with PBST for 5  
515 minutes. Embryos were incubated in blocking solution (0.2% Roche block, 10% FBS, 1% DMSO  
516 in PBST) for 30 minutes, followed by a 2-day incubation with primary antibodies at 4 °C.  
517 Primary antibodies used are as follows: anti-phH3 (#3377, Cell Signaling Technology; 1:1000),  
518 anti- $\alpha$ -tubulin (#T6199, Sigma-Aldrich; 1:500), and anti-BrdU (#B35141, Thermo Fisher  
519 Scientific). Antibodies were washed off with three 10-minute washes in PBST and two 10-minute  
520 washes in 1% FBS in PBST. Embryos were then incubated with secondary antibodies (1:1000) in  
521 1% FBS in PBST at 4 °C for 2 days in the dark. Secondary antibodies used for  
522 immunofluorescence were goat anti-mouse Alexa Fluor 488 (1:1000, #A11001, Thermo Fisher  
523 Scientific), chicken anti-rabbit Alexa Fluor 647(1:1000, #A21443, Thermo Fisher Scientific). On  
524 the second day, Hoechst 33342 (1 µg/ml) (Thermo Fisher Scientific; 1:1000) was added. Embryos  
525 were washed five times for 10 minutes with PBST and imaged.

526

### 527 **Microscopy**

528 Fixed embryos were immersed in 70% glycerol to obtain bright field images. Live  
529 embryos were anaesthetized with MS-222 (200 mg/L) and embedded in 3% methylcellulose.  
530 Bright-field images were captured using the Leica M205FA epifluorescence microscope equipped  
531 with a DFC490 camera and Leica Applications Suite software (Leica Microsystems, Germany).

532 For confocal microscopy embryos were mounted in 1% low melting agarose (w/v).  
533 Confocal images were acquired using a Nikon C2 confocal microscope as Z-stacks of the optical

534 sections. The images were processed using NIS-Elements Denoise.ai Software. Maximum  
535 intensity projections were used for the figures.

536

### 537 **BIO treatment**

538 30  $\mu\text{M}$  6-bromoindirubin-3'-oxime (BIO) solution was diluted to 2.5  $\mu\text{M}$  BIO in E3  
539 medium. Embryos were sorted into 50 embryos per plate and treated with 2.5  $\mu\text{M}$  BIO from 4 hpf  
540 until tailbud dissection at the 16-somite stage.

541

### 542 **Tailbud bulk RNA sequencing (RNA-seq) and analyses**

543 Tailbuds were dissected from stage-matched embryos at 16 somites (16-18 hpf) as  
544 illustrated in Figure 3A. For RNA-seq, tailbuds were individually lysed in 3  $\mu\text{L}$  of RLT + BME  
545 (Qiagen RNeasy) and stored in separate PCR tubes at  $-80^\circ\text{C}$  to await genotyping of heads (for  
546 *rad21*<sup>-/-</sup> and *rad21*<sup>+/-</sup>). Total RNA was extracted from the pools of 80 tailbuds per sample using  
547 the RNeasy Micro kit (74104; Qiagen, Germany). Quality and quantity of RNA were assessed  
548 using Qubit 4.0 Fluorometer (Thermo Fisher Scientific, USA), Agilent RNA 6000 Nano Kit on  
549 2100 Bioanalyzer (Agilent Technologies, Netherlands) and NanoPhotometer NP80 Touch  
550 (Implen GmbH, Germany).

551 Libraries were prepared from 250 ng of total RNA using the TruSeq Stranded mRNA  
552 Library Prep kit (Illumina, USA) and TruSeq RNA CD Index Plate (Illumina, USA) for sample  
553 multiplexing. The concentration of the libraries was quantified using a Qubit 4.0 Fluorometer  
554 (Thermo Fisher Scientific, USA), and the mean fragment size was assessed using the DNA High  
555 Sensitivity KIT on a 2100 Bioanalyzer (Agilent Technologies, Netherlands). 4 nM pooled  
556 libraries was sequenced on NovaSeq S1 flow cell by Livestock Improvement Corporation Ltd.  
557 (New Zealand).

558 RNA-seq reads were trimmed using Cutadapt [102], and aligned to the reference genome  
559 (GRCz11) with HISAT2 [103] and SAMtools [104]. FeatureCounts [105] was used to generate  
560 fragment count matrices. DESeq2 [106] was used to perform differential gene expression  
561 analysis, and multi-testing correction was done using the Benjamini-Hochberg procedure. The  
562 false discovery rate (FDR) threshold was set at 5%. Pathway analysis was performed using  
563 Reactome [107] and Metascape [108]. Genotype-specific BIO treatment effects were tested by  
564 adding an interaction term (modelling the interaction between treatment and genotype) at the  
565 experimental design stage prior to calling differential genes.

566

## 567 **Single cell RNA sequencing**

568 Stage matched 16-somite embryos (wild type or *stag2b*<sup>-/-</sup>) were dechorionated using  
569 pronase (20 mg/ml in E3) and deyolked in calcium-free Ringer's solution (116 mM NaCl, 2.6  
570 mM KCl, 5 mM HEPES, pH 7.0). Tailbud tissue was dissected using a small needle and pooled  
571 (n=30). Tailbuds were then incubated with collagenase (2 mg/ml in 0.05% trypsin, 1 mM EDTA,  
572 pH 8.0, PBS) in 1.3 ml volume at 28 °C for 15 mins with intermittent pipetting to achieve a single  
573 cell suspension. The reaction was stopped by adding 200 µL of a stop solution (30% calf serum, 6  
574 mM CaCl<sub>2</sub>, PBS). Cells were centrifuged at 500 x g for 5 min and re-suspended in 1 ml of  
575 resuspension solution (1% Calf Serum, 0.8 mM CaCl<sub>2</sub>, 50 U/ml Penicillin, 0.05 mg/ml  
576 Streptomycin). After centrifuging cells were resuspended in 700 µL of resuspension buffer and  
577 filtered through a 40 µm cell strainer and kept on ice. Single cell suspensions were processed at  
578 the Genomics High Throughput Facility (UC Irvine, USA) according to the manufacturers  
579 protocol for the 10X Chromium single cell platform (10X Genomics, Pleasanton, CA. USA)  
580 specifically the Chromium Single Cell 3' Library and Gel Bead Kit v3 (Cat.No. PN-1000128).  
581 Libraries were sequenced on a HiSeq2500 platform (Illumina) yielding 1,024,641,718 reads for  
582 wild type and 1,166,072,985 reads for the *stag2b*<sup>-/-</sup> sample.

583

## 584 **Single cell RNA sequencing data analysis**

585 Single-cell RNA-seq FASTQ files were demultiplexed using Cellranger (v7.1.0) [109],  
586 mapped to the Danio rerio.GRCz11 (danRer11) transcriptome (v4.3.2) [110] including intronic  
587 reads. We obtained an estimated number of 18,704 cells (wild type) and 26,360 cells (*stag2b*<sup>-/-</sup>).  
588 In the wild type sample mean reads per cell were 54,782, median UMI (unique molecular  
589 identifier) were 15,696 and 3,651 genes detected per cell.

590 In *stag2b*<sup>-/-</sup> we detected 44,236 mean reads per cell, 13,922 median UMIs and 3,561  
591 median genes per cell. The total number of genes detected was 25,879 for wild type and 26,168  
592 for *stag2b*<sup>-/-</sup>. 98.2% and 98.1% of reads (wild type/ *stag2b*<sup>-/-</sup>) had valid barcodes with Q30 of  
593 94.4% for both samples. 92% and 91.5% of the reads mapped confidently to the zebrafish  
594 genome. Downstream analysis was performed using scvi-tools (v0.20.3) [111] and scanpy  
595 (v1.9.3) [112]. After filtering of empty cells doublet removal was performed using Solo [113].  
596 scanpy was used to filter out cells with less than 200 genes, genes detected in less than 3 cells,  
597 cells exceeding gene counts of 98% of the median. We also filtered out cells having more than  
598 15% mitochondrial reads (indicating cellular stress).

599 Filtering and QC steps resulted in 15,298 wild type cells and 21,278 *stag2b*<sup>-/-</sup> cells. The  
600 data were then normalised to 10,000 UMIs per cell using the function (`scanpy.pp.normalize`).  
601 Integration of the two datasets was performed using `scvi-tools` function `scVI` model [114].  
602 Specifically we set up the model using the following command: `scvi.model.SCVI.setup_anndata`  
603 (`anndata`, `layer = "counts"`, `categorical_covariate_keys=["Genotype"]`,  
604 `continuous_covariate_keys=['pct_counts_mt', 'total_counts']`). We then trained the model and  
605 obtained the latent space with `model.get_latent_representation()`. The neighbourhood graph as  
606 well as the UMAP (Uniform Manifold Approximation and Projection) plot was determined using  
607 `scanpy` functions using the `scVI` latent space as input. Leiden clustering (resolution 0.5) resulted  
608 in 16 clusters (data not shown), which were partially merged into common clusters based on the  
609 expression of canonical marker genes. Significant differentially expressed genes (DEGs) between  
610 clusters and genotypes were determined using the the model calculated above using `scVI` as well  
611 as the Wilcoxon rank-sum test (Benjamini-Hochberg correction).

612 A list of differentially expressed genes in NMPs of wild type and *stag2b*<sup>-/-</sup> tailbuds can be  
613 found in Data S4. We used Augur (Skinnider et al., 2021) to analyse the effect of on cell types  
614 based on the genotype. Embeddings were calculated using `scanpy` function  
615 (`scanpy.tl.embedding_density`). We used the function (`scanpy.tl.score_genes`) for a list of genes  
616 obtained from wiki pathways: Canonical\_Wnt\_pathway (WP1349). The function  
617 (`scanpy.pp.scale`) was used to scale the data to unit variance and zero mean and the Wilcoxon  
618 rank-sum test (Benjamini-Hochberg correction) was used to determine significance for the data  
619 shown in Fig. 7.

620

## 621 **Data availability**

622 Bulk RNA-seq data are available at GEO under accession number GSE247246.

623 Raw and processed sc-RNA-seq data generated in this study are available at GEO under  
624 GSE171482.

625

## 626 **References**

- 627 1. Nasmyth, K. and C.H. Haering, *Cohesin: its roles and mechanisms*. *Annu Rev Genet*, 2009.  
628 **43**: p. 525-58.
- 629 2. Huis, P.J., et al., *Characterization of a DNA exit gate in the human cohesin ring*. *Science*,  
630 2014. **346**(6212): p. 968-972.
- 631 3. Gruber, S., C.H. Haering, and K. Nasmyth, *Chromosomal cohesin forms a ring*. *Cell*, 2003.  
632 **112**(6): p. 765-77.

- 633 4. Horsfield, J.A., C.G. Print, and M. Monnich, *Diverse developmental disorders from the one*  
634 *ring: distinct molecular pathways underlie the cohesinopathies*. *Front Genet*, 2012. **3**: p.  
635 171.
- 636 5. Dorsett, D. and L. Strom, *The ancient and evolving roles of cohesin in gene expression and*  
637 *DNA repair*. *Curr Biol*, 2012. **22**(7): p. R240-50.
- 638 6. Ciosk, R., et al., *Cohesin's binding to chromosomes depends on a separate complex*  
639 *consisting of Scc2 and Scc4 proteins*. *Molecular cell*, 2000. **5**(2): p. 243-254.
- 640 7. Kueng, S., et al., *Wapl controls the dynamic association of cohesin with chromatin*. *Cell*,  
641 2006. **127**(5): p. 955-967.
- 642 8. Sjögren, C. and K. Nasmyth, *Sister chromatid cohesion is required for postreplicative*  
643 *double-strand break repair in Saccharomyces cerevisiae*. *Current Biology*, 2001. **11**(12): p.  
644 991-995.
- 645 9. Watrin, E. and J.-M. Peters, *Cohesin and DNA damage repair*. *Experimental cell research*,  
646 2006. **312**(14): p. 2687-2693.
- 647 10. Hou, W., et al., *Cohesin in DNA damage response and double-strand break repair*. *Critical*  
648 *Reviews in Biochemistry and Molecular Biology*, 2022. **57**(3): p. 333-350.
- 649 11. Cukrov, D., et al., *Antioxidant treatment ameliorates phenotypic features of SMC1A-*  
650 *mutated Cornelia de Lange syndrome in vitro and in vivo*. *Human molecular genetics*, 2018.  
651 **27**(17): p. 3002-3011.
- 652 12. Horsfield, J.A., et al., *Cohesin-dependent regulation of Runx genes*. *Development*, 2007.  
653 **134**(14): p. 2639-49.
- 654 13. Percival, S.M., et al., *Variations in dysfunction of sister chromatid cohesion in esco2 mutant*  
655 *zebrafish reflect the phenotypic diversity of Roberts syndrome*. *Dis Model Mech*, 2015. **8**(8):  
656 p. 941-55.
- 657 14. Gerlich, D., et al., *Live-cell imaging reveals a stable cohesin-chromatin interaction after*  
658 *but not before DNA replication*. *Current biology*, 2006. **16**(15): p. 1571-1578.
- 659 15. Horsfield, J.A., *Full circle: a brief history of cohesin and the regulation of gene expression*.  
660 *The FEBS journal*, 2023. **290**(7): p. 1670-1687.
- 661 16. Cuadrado, A. and A. Losada, *Specialized functions of cohesins STAG1 and STAG2 in 3D*  
662 *genome architecture*. *Curr Opin Genet Dev*, 2020. **61**: p. 9-16.
- 663 17. Nishiyama, T., *Cohesion and cohesin-dependent chromatin organization*. *Current opinion*  
664 *in cell biology*, 2019. **58**: p. 8-14.
- 665 18. Ball, A.R., Jr., Y.Y. Chen, and K. Yokomori, *Mechanisms of cohesin-mediated gene*  
666 *regulation and lessons learned from cohesinopathies*. *Biochim Biophys Acta*, 2014.  
667 **1839**(3): p. 191-202.
- 668 19. Zhu, Z. and X. Wang. *Roles of cohesin in chromosome architecture and gene expression*.  
669 *in Seminars in Cell & developmental biology*. 2019. Elsevier.
- 670 20. Sanborn, A.L., et al., *Chromatin extrusion explains key features of loop and domain*  
671 *formation in wild-type and engineered genomes*. *Proceedings of the National Academy of*  
672 *Sciences*, 2015. **112**(47): p. E6456-E6465.
- 673 21. Fudenberg, G., et al., *Formation of chromosomal domains by loop extrusion*. *Cell reports*,  
674 2016. **15**(9): p. 2038-2049.



- 675 22. Davidson, I.F., et al., *DNA loop extrusion by human cohesin*. *Science*, 2019. **366**(6471): p.  
676 1338-1345.
- 677 23. Krijger, P.H. and W. de Laat, *Regulation of disease-associated gene expression in the 3D*  
678 *genome*. *Nat Rev Mol Cell Biol*, 2016. **17**(12): p. 771-782.
- 679 24. Hnisz, D., et al., *Activation of proto-oncogenes by disruption of chromosome*  
680 *neighborhoods*. *Science*, 2016. **351**(6280): p. 1454-1458.
- 681 25. Rao, S.S., et al., *A 3D map of the human genome at kilobase resolution reveals principles*  
682 *of chromatin looping*. *Cell*, 2014. **159**(7): p. 1665-1680.
- 683 26. Mayerova, N., L. Cipak, and J. Gregan, *Cohesin Biology: From Passive Rings to Molecular*  
684 *Motors*. *Trends Genet*, 2020. **36**(6): p. 387-389.
- 685 27. Wendt, K.S., et al., *Cohesin mediates transcriptional insulation by CCCTC-binding factor*.  
686 *Nature*, 2008. **451**(7180): p. 796-801.
- 687 28. Parelho, V., et al., *Cohesins functionally associate with CTCF on mammalian chromosome*  
688 *arms*. *Cell*, 2008. **132**(3): p. 422-433.
- 689 29. Dixon, J.R., et al., *Topological domains in mammalian genomes identified by analysis of*  
690 *chromatin interactions*. *Nature*, 2012. **485**(7398): p. 376-380.
- 691 30. Meier, M., et al., *Cohesin facilitates zygotic genome activation in zebrafish*. *Development*,  
692 2018. **145**(1): p. dev156521.
- 693 31. Kagey, M.H., et al., *Mediator and cohesin connect gene expression and chromatin*  
694 *architecture*. *Nature*, 2010. **467**(7314): p. 430-435.
- 695 32. Ochi, Y., et al., *Combined Cohesin-RUNX1 Deficiency Synergistically Perturbs Chromatin*  
696 *Looping and Causes Myelodysplastic Syndromes*. *Cancer Discov*, 2020. **10**(6): p. 836-853.
- 697 33. Marsman, J. and J.A. Horsfield, *Long distance relationships: enhancer-promoter*  
698 *communication and dynamic gene transcription*. *Biochim Biophys Acta*, 2012. **1819**(11-  
699 12): p. 1217-27.
- 700 34. Friman, E.T., et al., *Ultra-long-range interactions between active regulatory elements*.  
701 *Genome Research*, 2023. **33**(8): p. 1269-1283.
- 702 35. Goel, V.Y., M.K. Huseyin, and A.S. Hansen, *Region Capture Micro-C reveals coalescence*  
703 *of enhancers and promoters into nested microcompartments*. *Nature Genetics*, 2023: p. 1-  
704 9.
- 705 36. Kane, L., et al., *Cohesin is required for long-range enhancer action at the Shh locus*. *Nature*  
706 *structural & molecular biology*, 2022. **29**(9): p. 891-897.
- 707 37. Piché, J., et al., *The expanding phenotypes of cohesinopathies: one ring to rule them all!*  
708 *Cell Cycle*, 2019. **18**(21): p. 2828-2848.
- 709 38. Opitz, J.M. and J.F. Reynolds, *The Brachmann-de Lange syndrome*. *American journal of*  
710 *medical genetics*, 1985. **22**(1): p. 89-102.
- 711 39. Ireland, M., D. Donnai, and J. Burn, *Brachmann-de Lange syndrome. Delineation of the*  
712 *clinical phenotype*. *American journal of medical genetics*, 1993. **47**(7): p. 959-964.
- 713 40. Jackson, L., et al., *de Lange syndrome: a clinical review of 310 individuals*. *American*  
714 *journal of medical genetics*, 1993. **47**(7): p. 940-946.
- 715 41. Liu, J., et al., *Transcriptional dysregulation in NIPBL and cohesin mutant human cells*.  
716 *PLoS biology*, 2009. **7**(5): p. e1000119.

- 717 42. Krantz, I.D., et al., *Cornelia de Lange syndrome is caused by mutations in NIPBL, the*  
718 *human homolog of Drosophila melanogaster Nipped-B*. Nature genetics, 2004. **36**(6): p.  
719 631-635.
- 720 43. Tonkin, E.T., et al., *NIPBL, encoding a homolog of fungal Scc2-type sister chromatid*  
721 *cohesion proteins and fly Nipped-B, is mutated in Cornelia de Lange syndrome*. Nature  
722 genetics, 2004. **36**(6): p. 636-641.
- 723 44. Cheung, K. and J. Upton, *Cornelia de Lange Syndrome*. J Hand Surg Am, 2015. **40**(12): p.  
724 2501-3.
- 725 45. Deardorff, M.A., S.E. Noon, and I.D. Krantz, *Cornelia de Lange syndrome*. 2020.
- 726 46. Deardorff, M.A., et al., *HDAC8 mutations in Cornelia de Lange syndrome affect the cohesin*  
727 *acetylation cycle*. Nature, 2012. **489**(7415): p. 313-7.
- 728 47. Deardorff, M.A., et al., *Mutations in cohesin complex members SMC3 and SMC1A cause a*  
729 *mild variant of cornelia de Lange syndrome with predominant mental retardation*. Am J  
730 Hum Genet, 2007. **80**(3): p. 485-94.
- 731 48. Deardorff, M.A., et al., *RAD21 mutations cause a human cohesinopathy*. The American  
732 Journal of Human Genetics, 2012. **90**(6): p. 1014-1027.
- 733 49. Mungan, Z., et al., *Familial visceral myopathy with pseudo-obstruction, megaduodenum,*  
734 *Barrett's esophagus, and cardiac abnormalities*. Official journal of the American College  
735 of Gastroenterology| ACG, 2003. **98**(11): p. 2556-2560.
- 736 50. Zhang, B.N., et al., *A cohesin subunit variant identified from a peripheral sclerocornea*  
737 *pedigree*. Disease Markers, 2019. **2019**.
- 738 51. Kruszka, P., et al., *Cohesin complex-associated holoprosencephaly*. Brain, 2019. **142**(9): p.  
739 2631-2643.
- 740 52. Krab, L.C., et al., *Delineation of phenotypes and genotypes related to cohesin structural*  
741 *protein RAD21*. Human genetics, 2020. **139**(5): p. 575-592.
- 742 53. Cheng, H., N. Zhang, and D. Pati, *Cohesin subunit RAD21: From biology to disease*. Gene,  
743 2020. **758**: p. 144966.
- 744 54. Sun, Y., et al., *RAD21 is the core subunit of the cohesin complex involved in directing*  
745 *genome organization*. Genome Biology, 2023. **24**(1): p. 1-27.
- 746 55. Liu, Y. and J. Dekker, *CTCF-CTCF loops and intra-TAD interactions show differential*  
747 *dependence on cohesin ring integrity*. Nature cell biology, 2022. **24**(10): p. 1516-1527.
- 748 56. Nagasaka, K., et al., *Cohesin mediates DNA loop extrusion and sister chromatid cohesion*  
749 *by distinct mechanisms*. Molecular Cell, 2023. **83**(17): p. 3049-3063. e6.
- 750 57. Cratsenberg, D.M., P.J. Winningham, and L.J. Starr, *Second reported individual with a*  
751 *partial STAG2 deletion: Middle interhemispheric variant holoprosencephaly in STAG2-*  
752 *related cohesinopathy*. Clinical Dysmorphology, 2021. **30**(3): p. 159-163.
- 753 58. Soardi, F.C., et al., *Familial STAG2 germline mutation defines a new human cohesinopathy*.  
754 NPJ genomic medicine, 2017. **2**(1): p. 7.
- 755 59. Mullegama, S.V., et al., *Mutations in STAG2 cause an X-linked cohesinopathy associated*  
756 *with undergrowth, developmental delay, and dysmorphia: Expanding the phenotype in*  
757 *males*. Molecular genetics & genomic medicine, 2019. **7**(2): p. e00501.

- 758 60. Mullegama, S.V., et al., *De novo loss-of-function variants in STAG2 are associated with*  
759 *developmental delay, microcephaly, and congenital anomalies*. American journal of  
760 *medical genetics Part A*, 2017. **173**(5): p. 1319-1327.
- 761 61. Freyberger, F., et al., *Expanding the known phenotype of Mullegama–Klein–Martinez*  
762 *syndrome in male patients*. Human Genome Variation, 2021. **8**(1): p. 37.
- 763 62. Yuan, B., et al., *Clinical exome sequencing reveals locus heterogeneity and phenotypic*  
764 *variability of cohesinopathies*. Genetics in Medicine, 2019. **21**(3): p. 663-675.
- 765 63. Schmidt, J., et al., *Somatic mosaicism in STAG2-associated cohesinopathies: Expansion of*  
766 *the genotypic and phenotypic spectrum*. Frontiers in Cell and Developmental Biology, 2022.  
767 **10**: p. 1025332.
- 768 64. Gokce-Samar, Z., et al., *STAG2 microduplication in a patient with eyelid myoclonia and*  
769 *absences and a review of EMA-related reported genes*. European Journal of Medical  
770 *Genetics*, 2022: p. 104636.
- 771 65. Kojic, A., et al., *Distinct roles of cohesin-SAI and cohesin-SA2 in 3D chromosome*  
772 *organization*. Nature structural & molecular biology, 2018. **25**(6): p. 496-504.
- 773 66. Cheng, N., et al., *STAG2 promotes the myelination transcriptional program in*  
774 *oligodendrocytes*. Elife, 2022. **11**: p. e77848.
- 775 67. Porter, H., et al., *Cohesin-independent STAG proteins interact with RNA and R-loops and*  
776 *promote complex loading*. Elife, 2023. **12**: p. e79386.
- 777 68. Remeseiro, S., et al., *A unique role of cohesin-SAI in gene regulation and development*.  
778 *EMBO J*, 2012. **31**(9): p. 2090-102.
- 779 69. Viny, A.D., et al., *Cohesin Members Stag1 and Stag2 Display Distinct Roles in Chromatin*  
780 *Accessibility and Topological Control of HSC Self-Renewal and Differentiation*. Cell Stem  
781 *Cell*, 2019. **25**(5): p. 682-696 e8.
- 782 70. Pherson, M., et al., *Cohesin occupancy and composition at enhancers and promoters are*  
783 *linked to DNA replication origin proximity in Drosophila*. Genome research, 2019. **29**(4):  
784 p. 602-612.
- 785 71. Bailey, M.L., et al., *Paralogous synthetic lethality underlies genetic dependencies of the*  
786 *cancer-mutated gene STAG2*. Life Science Alliance, 2021. **4**(11).
- 787 72. Adane, B., et al., *STAG2 loss rewires oncogenic and developmental programs to promote*  
788 *metastasis in Ewing sarcoma*. Cancer cell, 2021. **39**(6): p. 827-844. e10.
- 789 73. Liu, J. and I.D. Krantz, *Cohesin and human disease*. Annu. Rev. Genomics Hum. Genet.,  
790 2008. **9**: p. 303-320.
- 791 74. McNairn, A.J. and J.L. Gerton, *The chromosome glue gets a little stickier*. Trends in  
792 *genetics*, 2008. **24**(8): p. 382-389.
- 793 75. Dorsett, D. and I.D. Krantz, *On the molecular etiology of Cornelia de Lange syndrome*.  
794 *Annals of the New York Academy of Sciences*, 2009. **1151**(1): p. 22-37.
- 795 76. Muto, A., et al., *Multifactorial origins of heart and gut defects in nipbl-deficient zebrafish,*  
796 *a model of Cornelia de Lange Syndrome*. PLoS biology, 2011. **9**(10): p. e1001181.
- 797 77. Ketharnathan, S., A. Labudina, and J.A. Horsfield, *Cohesin Components Stag1 and Stag2*  
798 *Differentially Influence Haematopoietic Mesoderm Development in Zebrafish Embryos*.  
799 *Front Cell Dev Biol*, 2020. **8**: p. 617545.

- 800 78. Schuster, K., et al., *A neural crest origin for cohesinopathy heart defects*. Hum Mol Genet, 2015. **24**(24): p. 7005-16.  
801
- 802 79. Muto, A. and T.F. Schilling, *Zebrafish as a model to study cohesin and cohesinopathies*. Cohesin and Condensin: Methods and Protocols, 2017: p. 177-196.  
803
- 804 80. Row, R.H., et al., *The zebrafish tailbud contains two independent populations of midline progenitor cells that maintain long-term germ layer plasticity and differentiate in response to local signaling cues*. Development, 2016. **143**(2): p. 244-254.  
805  
806
- 807 81. Steventon, B. and B. Martin, *A fishy tail: Insights into the cell and molecular biology of neuromesodermal cells from zebrafish embryos*. 2022.  
808
- 809 82. Kalev-Zylinska, M.L., et al., *Runx1 is required for zebrafish blood and vessel development and expression of a human RUNX1-CBF2T1 transgene advances a model for studies of leukemogenesis*. 2002.  
810  
811
- 812 83. Casa, V., et al., *Redundant and specific roles of cohesin STAG subunits in chromatin looping and transcriptional control*. Genome Research, 2020. **30**(4): p. 515-527.  
813
- 814 84. Thisse, B., et al., *Expression of the zebrafish genome during embryogenesis*. 2001. ZFIN Direct Data Submission (<http://zfin.org>), 2001.  
815
- 816 85. Goto, H., et al., *FGF and canonical Wnt signaling cooperate to induce paraxial mesoderm from tailbud neuromesodermal progenitors through regulation of a two-step epithelial to mesenchymal transition*. Development, 2017. **144**(8): p. 1412-1424.  
817  
818
- 819 86. Kukreja, K., et al., *Global decoupling of cell differentiation from cell division in early embryo development*. bioRxiv, 2023: p. 2023.07. 29.551123.  
820
- 821 87. Marsman, J., et al., *Cohesin and CTCF differentially regulate spatiotemporal runx1 expression during zebrafish development*. Biochim Biophys Acta, 2014. **1839**(1): p. 50-61.  
822
- 823 88. Weiss, F.D., et al., *Neuronal genes deregulated in Cornelia de Lange Syndrome respond to removal and re-expression of cohesin*. Nature Communications, 2021. **12**(1): p. 2919.  
824
- 825 89. Medina, M.A., et al., *Alternative RUNX1 Promoter Regulation by Wnt/beta-Catenin Signaling in Leukemia Cells and Human Hematopoietic Progenitors*. J Cell Physiol, 2016. **231**(7): p. 1460-7.  
826  
827
- 828 90. Chin, C.V., et al., *Cohesin mutations are synthetic lethal with stimulation of WNT signaling*. Elife, 2020. **9**: p. e61405.  
829
- 830 91. Grazioli, P., et al., *Lithium as a possible therapeutic strategy for Cornelia de Lange syndrome*. Cell Death Discovery, 2021. **7**(1): p. 34.  
831
- 832 92. Pileggi, S., et al., *Cohesin Mutations Induce Chromatin Conformation Perturbation of the H19/IGF2 Imprinted Region and Gene Expression Dysregulation in Cornelia de Lange Syndrome Cell Lines*. Biomolecules, 2021. **11**(11): p. 1622.  
833  
834
- 835 93. Mazzola, M., et al., *NIPBL: a new player in myeloid cell differentiation*. Haematologica, 2019. **104**(7): p. 1332.  
836
- 837 94. Park, D.S., et al., *High-throughput Oligopaint screen identifies druggable 3D genome regulators*. Nature, 2023: p. 1-9.  
838
- 839 95. Alonso-Gil, D., et al., *Different NIPBL requirements of cohesin-STAG1 and cohesin-STAG2*. Nature Communications, 2023. **14**(1): p. 1326.  
840
- 841 96. Chea, S., et al., *Gastrulation-stage gene expression in Nipbl<sup>+/-</sup> mouse embryos foreshadows the development of syndromic birth defects*. bioRxiv, 2023: p. 2023.10. 16.558465.  
842



- 843 97. Rauch, G.-J., M. Granato, and P. Haffter, *A polymorphic zebrafish line for genetic mapping*  
844 *using SSLPs on high-percentage agarose gels*. Technical Tips Online, 1997. **2**(1): p. 148-  
845 150.
- 846 98. Westerfield, M., *The zebrafish book: a guide for the laboratory use of zebrafish*  
847 *(Brachydanio rerio)*. 1995: University of Oregon press.
- 848 99. García-Castro, H., et al., *ACME dissociation: a versatile cell fixation-dissociation method*  
849 *for single-cell transcriptomics*. Genome biology, 2021. **22**: p. 1-34.
- 850 100. Meeker, N.D., et al., *Method for isolation of PCR-ready genomic DNA from zebrafish*  
851 *tissues*. Biotechniques, 2007. **43**(5): p. 610-614.
- 852 101. Teague, B., *Cytoflow: A python toolbox for flow cytometry*. bioRxiv, 2022: p. 2022.07.  
853 22.501078.
- 854 102. Martin, M., *Cutadapt removes adapter sequences from high-throughput sequencing reads*.  
855 EMBnet. journal, 2011. **17**(1): p. 10-12.
- 856 103. Kim, D., et al., *Graph-based genome alignment and genotyping with HISAT2 and HISAT-*  
857 *genome*. Nature biotechnology, 2019. **37**(8): p. 907-915.
- 858 104. Danecek, P., et al., *Twelve years of SAMtools and BCFtools*. Gigascience, 2021. **10**(2): p.  
859 giab008.
- 860 105. Liao, Y., G.K. Smyth, and W. Shi, *featureCounts: an efficient general purpose program for*  
861 *assigning sequence reads to genomic features*. Bioinformatics, 2014. **30**(7): p. 923-930.
- 862 106. Love, M.I., W. Huber, and S. Anders, *Moderated estimation of fold change and dispersion*  
863 *for RNA-seq data with DESeq2*. Genome biology, 2014. **15**(12): p. 1-21.
- 864 107. Yu, G. and Q.-Y. He, *ReactomePA: an R/Bioconductor package for reactome pathway*  
865 *analysis and visualization*. Molecular BioSystems, 2016. **12**(2): p. 477-479.
- 866 108. Zhou, Y., et al., *Metascape provides a biologist-oriented resource for the analysis of*  
867 *systems-level datasets*. Nature communications, 2019. **10**(1): p. 1523.
- 868 109. Zheng, G.X., et al., *Massively parallel digital transcriptional profiling of single cells*.  
869 Nature communications, 2017. **8**(1): p. 14049.
- 870 110. Lawson, N.D., et al., *An improved zebrafish transcriptome annotation for sensitive and*  
871 *comprehensive detection of cell type-specific genes*. Elife, 2020. **9**: p. e55792.
- 872 111. Gayoso, A., et al., *A Python library for probabilistic analysis of single-cell omics data*.  
873 Nature biotechnology, 2022. **40**(2): p. 163-166.
- 874 112. Wolf, F.A., P. Angerer, and F.J. Theis, *SCANPY: large-scale single-cell gene expression*  
875 *data analysis*. Genome biology, 2018. **19**: p. 1-5.
- 876 113. Bernstein, N.J., et al., *Solo: doublet identification in single-cell RNA-seq via semi-*  
877 *supervised deep learning*. Cell systems, 2020. **11**(1): p. 95-101. e5.
- 878 114. Lopez, R., et al., *Deep generative modeling for single-cell transcriptomics*. Nature methods,  
879 2018. **15**(12): p. 1053-1058.

880  
881  
882  
883



884 **Acknowledgments**

885 The authors would like to thank Noel Jhinku and Dr Doug Mackie for the expert management of  
886 the zebrafish facility and Dr Robert Woolley for the confocal microscopy advice. The authors are  
887 grateful to Dr Ben Martin and Dr Christian Mosimann for helpful advice and discussions.

888

889 **Funding:**

890 Royal Society of NZ Marsden Fund grant 20-UOO-071 (JAH, GG)

891

892 **Author contributions:**

893 Conceptualization: AAL, JA, JAH

894 Methodology: AAL, MM, GG, DT, BM, JA, JAH

895 Investigation: AAL, MM, GG, DT, SK, JA, JAH

896 Visualization: AAL, MM, GG, DT, SK, TFS, JA, JAH

897 Supervision: GG, JA, TFS, JAH

898 Writing—original draft: AAL, MM, JAH

899 Writing—review & editing: AAL, MM, GG, DT, SK, TFS, JA, JAH

900

901 **Competing interests:**

902 No competing interest declared

903

904 **Data and materials availability:**

905 All data are available in the main text or the supplementary materials.

906

907 **Supplementary Materials**

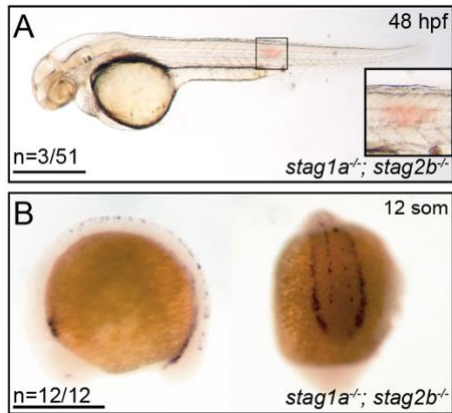

908

909 **Fig. S1. Trunk haemorrhaging at 48 hpf and *runx1* expression at 12 hpf in *stag1a*<sup>-/-</sup>; *stag2b*<sup>-/-</sup>**  
910 **embryos.**

911 (A) Lateral views of representative and *stag1a*<sup>-/-</sup>; *stag2b*<sup>-/-</sup> embryos at 48 hpf. The boxed region  
912 (inset) outlines a trunk haemorrhage representative of those observed in around 5% of the *stag1a*<sup>-/-</sup>;  
913 *stag2b*<sup>-/-</sup> double mutant embryos. Scale bars are 500  $\mu$ m.

914 (B) Normal expression of *runx1* at 12 somites in *stag1a*<sup>-/-</sup>; *stag2b*<sup>-/-</sup> embryos. Lateral (left) and  
915 posterior (right) views are shown. Scale bars are 500  $\mu$ m. The numbers in the lower left hand  
916 corner indicate the number of embryos with the expression pattern shown.

917

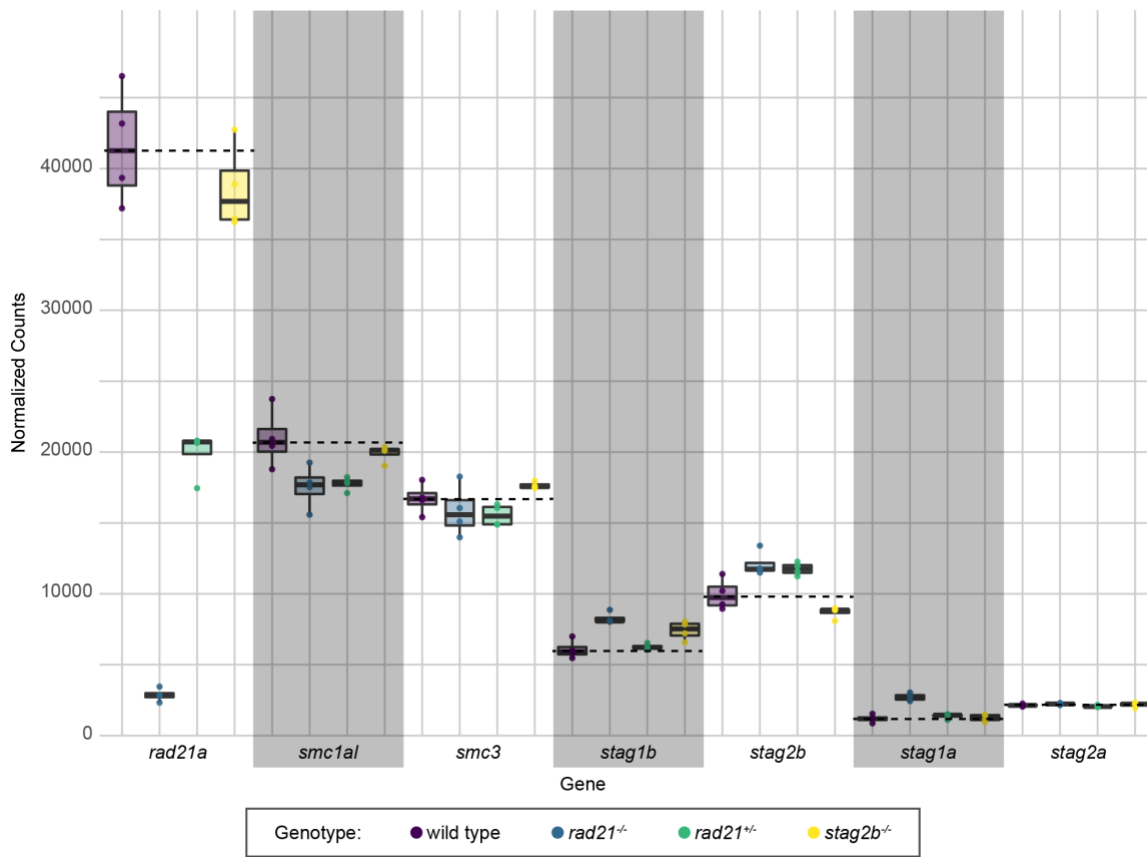

918

919 **Fig. S2. Transcript counts of cohesin subunits in the tailbud.**

920 Normalised transcript counts of *rad21a*, *smc1a1*, *smc3*, *stag1b*, *stag2b*, *stag1a* and *stag2a* taken  
921 from RNA-seq of tailbuds and visualised with box plots of the 4 replicates. Genotypes are  
922 distinguished by colour: wild type samples are displayed in purple, *rad21*<sup>-/-</sup> in blue, *rad21*<sup>+/-</sup> in  
923 green, and *stag2b*<sup>-/-</sup> samples in yellow. For each panel, the dotted line indicates the level of  
924 expression in wild type.  
925

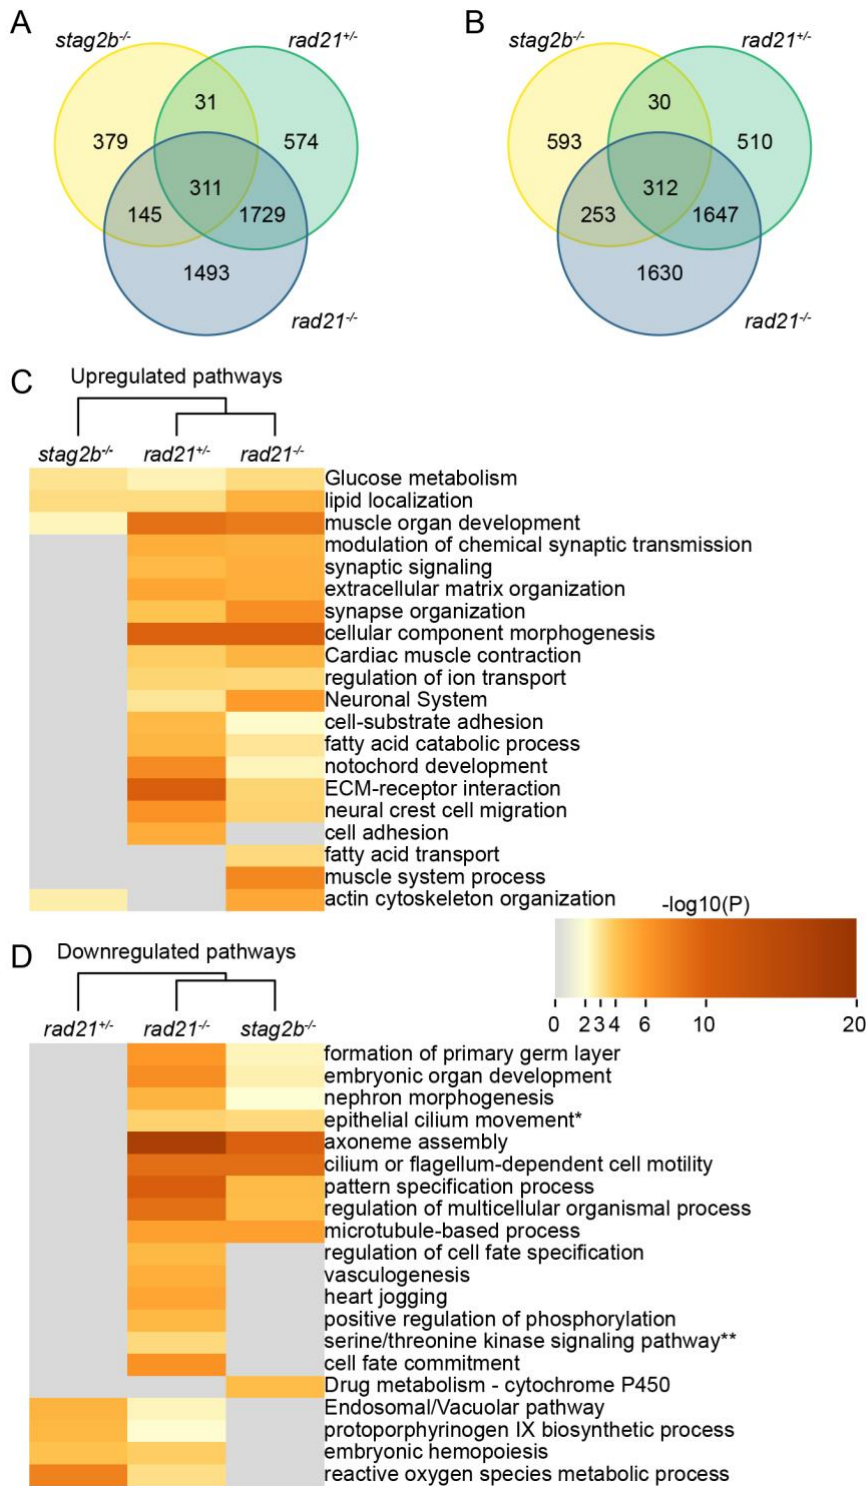

**Fig. S3.**

**Overlap of dysregulated genes and pathway enrichment in cohesin mutant tailbuds.**

(A, B) The Venn diagrams depict the overlap of significantly upregulated (A) and downregulated (B) genes in cohesin deficient tailbuds. (C, D) Metascape heat maps displaying the top 20 terms enriched among significantly upregulated (C) and downregulated (D) genes in cohesin-deficient tailbuds. Corresponding *p*-values are indicated by the colour scale.

\*Epithelial cilium movement involved in extracellular fluid movement

\*\*Regulation of transmembrane receptor protein serine/threonine kinase signalling pathway

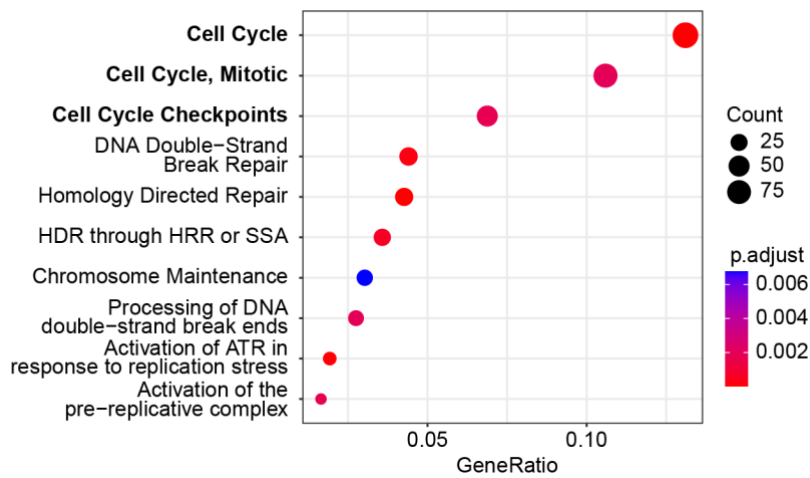

936  
937  
938  
939  
940  
941

**Fig. S1. Reactome analyses of downregulated pathways in *rad21*<sup>-/-</sup> mutant tailbuds.**

The dot plot shows the top 10 enriched Reactome pathways (out of 26) among the significantly downregulated genes in *rad21*<sup>-/-</sup> tailbuds. The size of each dot indicates the number of genes affected in the pathway, and the dot colour represents the adjusted p-value (Padj).



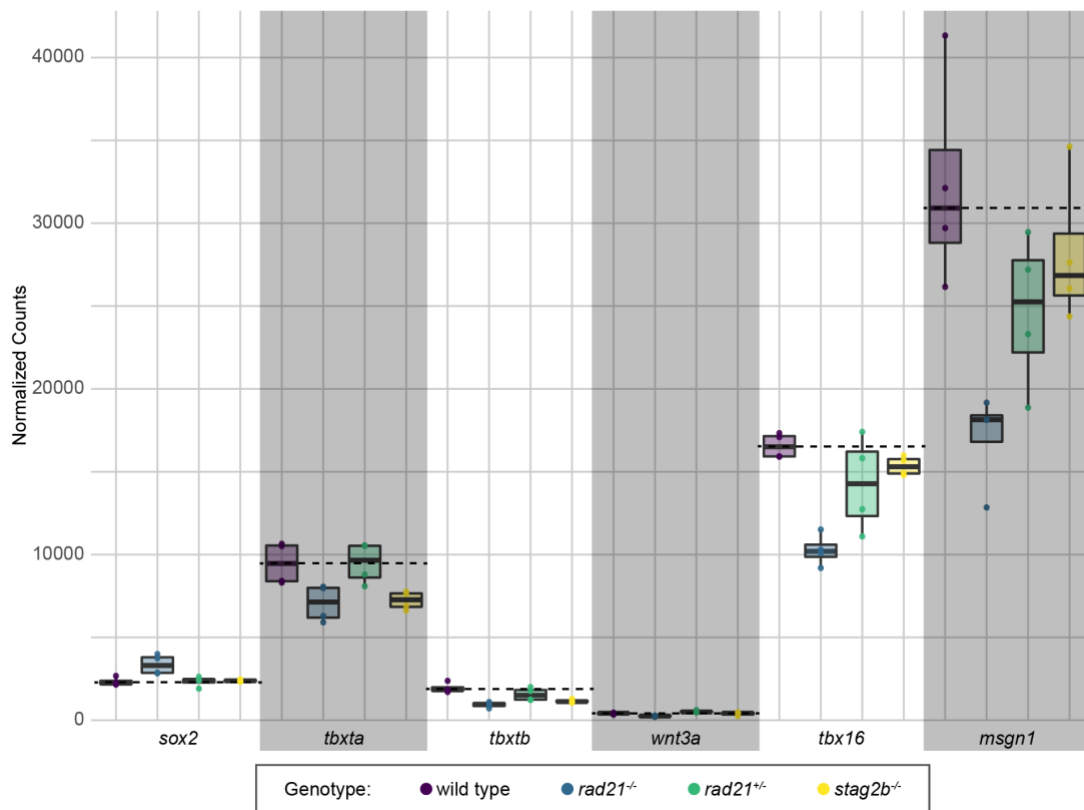

942  
943  
944  
945  
946  
947  
948  
949

**Fig. S2. Expression levels of *sox2*, *tbxta*, *tbxtb*, *wnt3a*, *tbx16* and *msgn1* in cohesin mutants.** Normalised transcript counts of *sox2*, *tbxta*, *tbxtb*, *wnt3a*, *tbx16* and *msgn1* taken from tailbud RNA-seq data with 4 replicates visualised as box plots. Genotypes are distinguished by colour: wild type samples are displayed in purple, *rad21*<sup>-/-</sup> in blue, *rad21*<sup>+/-</sup> in green, and *stag2b*<sup>-/-</sup> samples in yellow.

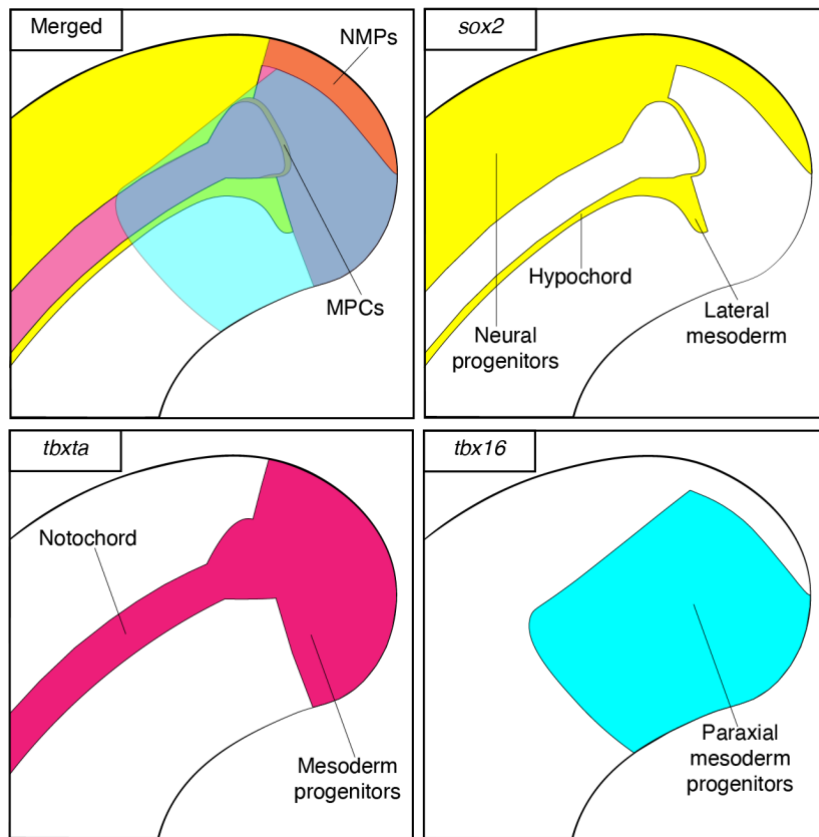

950  
951  
952  
953  
954  
955

**Fig. S3. Expression pattern of marker genes in the tailbud at the 16 somite stage.** Schematic depicts the regions in the tailbud and progenitor types where expression of *sox2* (yellow), *tbxta* (magenta) and *tbx16* (cyan) expression is expected.

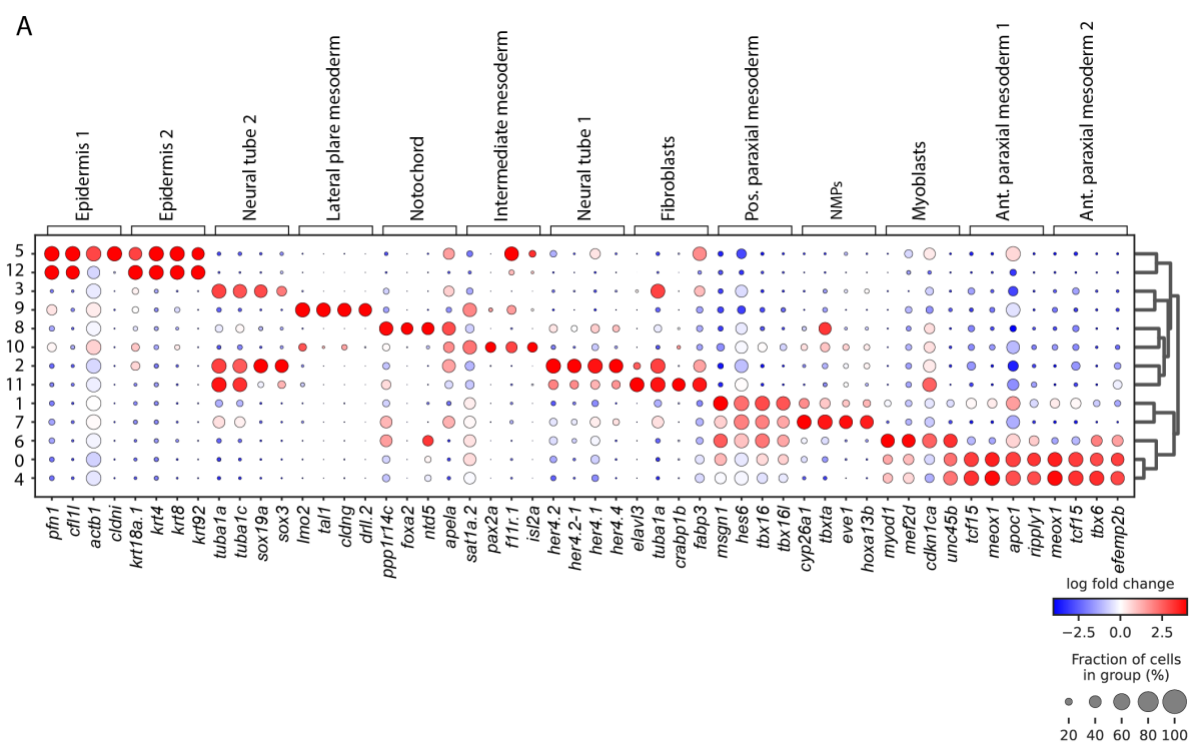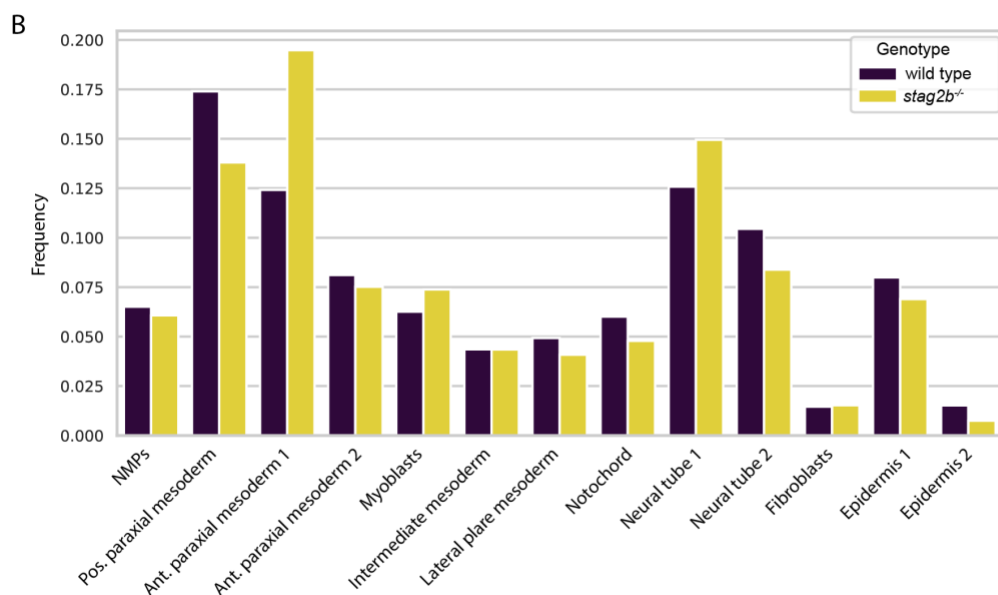

956  
957  
958  
959  
960  
961  
962  
963

**Fig. S4. Cell population analysis of single cell RNA sequencing of *stag2b*<sup>-/-</sup> tailbuds compared with wild type.**

(A) Dot plot depicting the expression of the top 4 marker genes per cell population cluster identified (see Fig. 7A). The dot size scales with the fraction of cells expressing the gene, and the dot colour indicates the log fold change between the clusters. (B) Differences in the proportion of cell types between wild type and *stag2b*<sup>-/-</sup> tailbuds among clusters as shown in Fig. 7A.

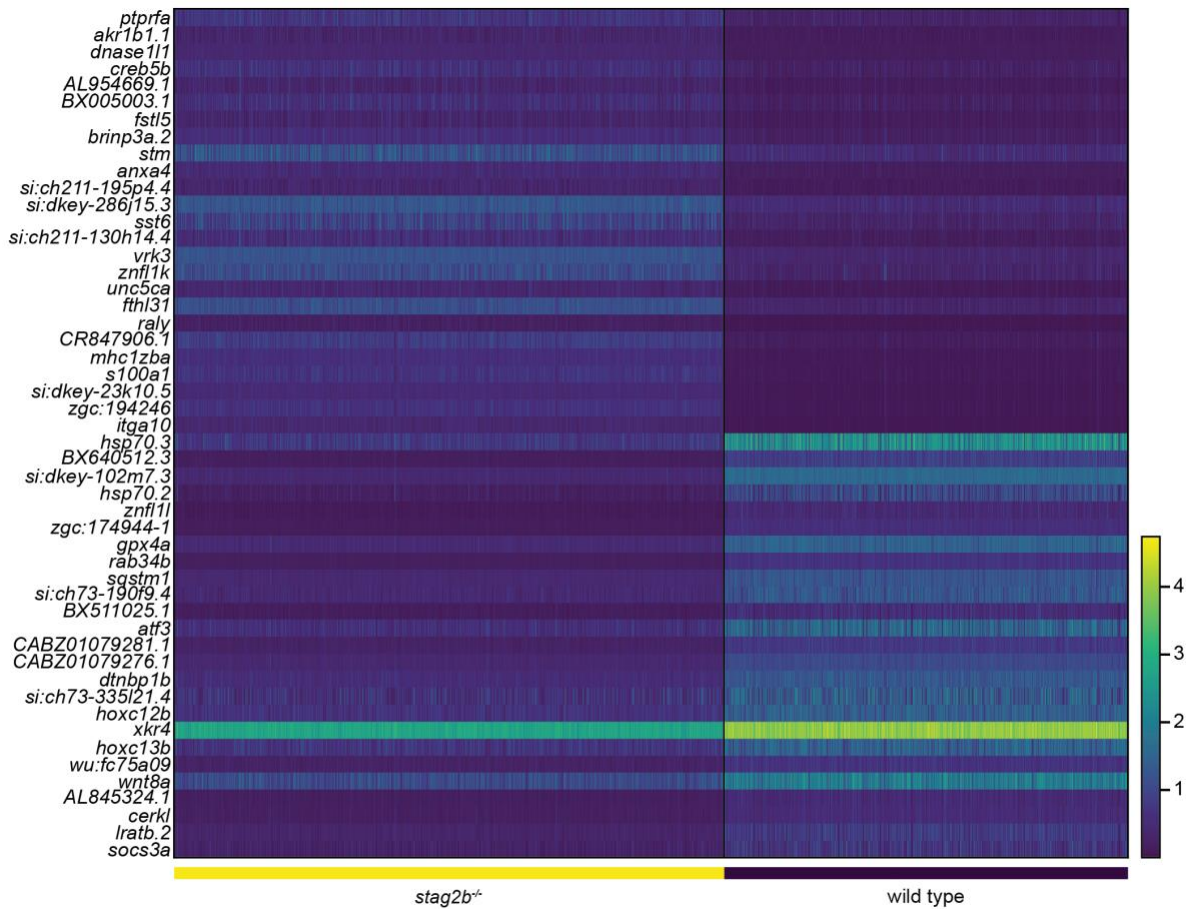

964  
965  
966  
967  
968

**Fig. S5 . Heat map showing the top 25 differentially up- and downregulated genes between wild type and *stag2b*<sup>-/-</sup> NMPs. For a full list see Supplementary Data 1.**

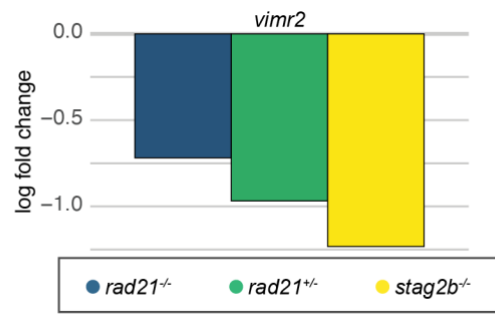

969  
970  
971  
972  
973  
974

**Fig. S6. *vimr2* expression in cohesin mutants.** The bar graph displays the log<sub>2</sub> fold change (5% FDR) for *vimr2* transcripts in *rad21<sup>-/-</sup>* (blue), *rad21<sup>+/-</sup>* (green) and *stag2b<sup>-/-</sup>* (yellow) tailbuds compared to wild type.



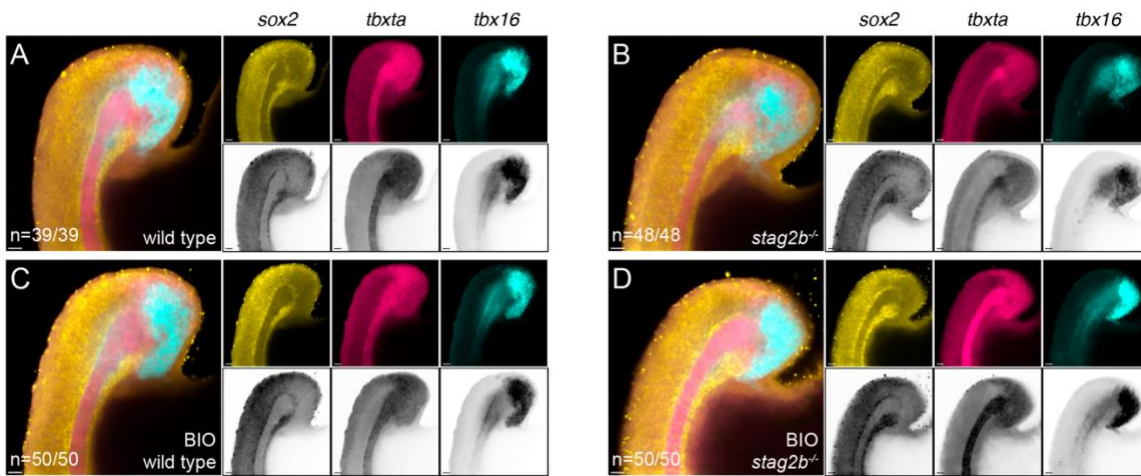

975  
976  
977  
978  
979  
980  
981  
982

**Fig. S7. Wnt stimulation rescues the notochord phenotype in *stag2b*<sup>-/-</sup>**

(A-D) Expression patterns of *sox2* (yellow), *tbxta* (magenta), and *tbx16* (cyan) in wild type (A, C) and *stag2b*<sup>-/-</sup> (B, D) zebrafish tailbuds with (C, D) and without (A, B) Wnt stimulation. Images are maximum intensity projections of 3 (4.8 μm) optical sections. Scale bars are 20 μm. The number of embryos with each expression pattern out of the total analysed is noted.

983 **Data S1 (separate file):** Cell cycle genes (Reactome PA) significantly (5% FDR) dysregulated in  
984 homozygous *rad21* tailbuds

985  
986 **Data S2 (separate file):** Cell cycle genes (Reactome PA) significantly (5% FDR) dysregulated in  
987 heterozygous *rad21* tailbuds

988 \

989 **Data S3 (separate file):** Cell cycle genes (Reactome PA) significantly (5% FDR) dysregulated in  
990 homozygous *stag2b* tailbuds

991  
992 **Data S4 (separate file):** Differentially expressed genes in the NMP subset comparing  
993 homozygous *stag2b* and wild type tailbuds, related to Figure S8

994  
995 **Data S5 (separate file):** Gene list related to canonical Wnt signalling score, related to Figure 7E

996  
997 **Data S6 (separate file):** Wilcoxon rank sum test statistics for each cell cluster comparing the Wnt  
998 signalling score shown in Figure 7E among homozygous *stag2b* and wild type genotypes
